# Supplementary material for: Edaphic and light conditions of sympatric plant morphotypes in western Amazonia
Source: Biodivers Data J. 2014 May 10;(2):e1078. doi: 10.3897/BDJ.2.e1078 (PMC4040399; doi:10.3897/BDJ.2.e1078)
Supplement: Supplementary material 1 — Occurence data for Geonoma macrostachys Mart. morphotypes on transects at three Peruvian forests [file biodiversity_data_journal-2-e1078-s001.xls]

## Sheet: raw data
Location	habitat	Plot	G. macrostachys morphotype	# individuals	inclination
EBCC	floodplain	CT1s1	0	0	0
EBCC	floodplain	CT1s2	acaulis	1	1
EBCC	floodplain	CT1s3	acaulis	1	-1
EBCC	floodplain	CT1s4	0	0	1
EBCC	floodplain	CT1s5	0	0	0
EBCC	floodplain	CT1s6	acaulis	1	2
EBCC	floodplain	CT1s7	0	0	-1
EBCC	floodplain	CT1s8	acaulis	1	2
EBCC	floodplain	CT1s8	macrostachys	1	2
EBCC	floodplain	CT1s9	0	0	1.5
EBCC	floodplain	CT1s10	0	0	0
EBCC	floodplain	CT1s11	0	0	5
EBCC	floodplain	CT1s12	0	0	7
EBCC	floodplain	CT1s13	0	0	3
EBCC	floodplain	CT1s14	0	0	2
EBCC	floodplain	CT1s15	0	0	0
EBCC	floodplain	CT2s1	macrostachys	1	-1
EBCC	floodplain	CT2s2	macrostachys	1	0
EBCC	floodplain	CT2s3	0	0	-1
EBCC	floodplain	CT2s4	macrostachys	1	-1.5
EBCC	floodplain	CT2s5	0	0	0
EBCC	floodplain	CT2s6	0	0	0
EBCC	floodplain	CT2s7	0	0	2
EBCC	floodplain	CT2s8	macrostachys	1	1
EBCC	floodplain	CT2s9	acaulis	1	0
EBCC	floodplain	CT2s9	macrostachys	4	0
EBCC	floodplain	CT2s10	macrostachys	1	0
EBCC	floodplain	CT2s11	macrostachys	7	-1
EBCC	floodplain	CT2s12	macrostachys	4	0
EBCC	floodplain	CT2s13	0	0	0
EBCC	floodplain	CT2s14	macrostachys	1	0
EBCC	floodplain	CT2s15	acaulis	1	-1.5
EBCC	floodplain	CT2s15	macrostachys	3	-1.5
EBCC	floodplain	CT3s1	0	0	1
EBCC	floodplain	CT3s2	acaulis	1	0
EBCC	floodplain	CT3s3	acaulis	3	0
EBCC	floodplain	CT3s4	acaulis	1	-2
EBCC	floodplain	CT3s5	acaulis	1	0
EBCC	floodplain	CT3s6	0	0	0
EBCC	floodplain	CT3s7	0	0	-1
EBCC	floodplain	CT3s8	0	0	0.5
EBCC	floodplain	CT3s9	acaulis	1	0
EBCC	floodplain	CT3s9	macrostachys	2	0
EBCC	floodplain	CT3s10	0	0	0
EBCC	floodplain	CT3s11	acaulis	1	1
EBCC	floodplain	CT3s12	0	0	3
EBCC	floodplain	CT3s13	acaulis	1	1
EBCC	floodplain	CT3s14	0	0	1
EBCC	floodplain	CT3s15	acaulis	1	1
EBCC	floodplain	CT4s1	0	0	-1.5
EBCC	floodplain	CT4s2	acaulis	1	-1.5
EBCC	floodplain	CT4s2	macrostachys	1	-1.5
EBCC	floodplain	CT4s3	0	0	-1
EBCC	floodplain	CT4s4	0	0	0
EBCC	floodplain	CT4s5	acaulis	1	0
EBCC	floodplain	CT4s6	0	0	-0.5
EBCC	floodplain	CT4s7	0	0	0
EBCC	floodplain	CT4s8	0	0	2
EBCC	floodplain	CT4s9	0	0	-0.5
EBCC	floodplain	CT4s10	0	0	0
EBCC	floodplain	CT4s11	acaulis	1	-2
EBCC	floodplain	CT4s12	0	0	0
EBCC	floodplain	CT4s13	0	0	0.5
EBCC	floodplain	CT4s14	0	0	1
EBCC	floodplain	CT4s15	0	0	0
EBCC	terra firme	CT6s1	macrostachys	1	-5.5
EBCC	terra firme	CT6s2	macrostachys	1	-5
EBCC	terra firme	CT6s3	0	0	0
EBCC	terra firme	CT6s4	0	0	3.5
EBCC	terra firme	CT6s5	macrostachys	4	2
EBCC	terra firme	CT6s6	macrostachys	3	-10
EBCC	terra firme	CT6s7	macrostachys	3	0
EBCC	terra firme	CT6s8	macrostachys	1	1
EBCC	terra firme	CT6s9	macrostachys	1	-1
EBCC	terra firme	CT6s10	macrostachys	3	0
EBCC	terra firme	CT6s11	macrostachys	2	5
EBCC	terra firme	CT6s12	macrostachys	3	3
EBCC	terra firme	CT6s13	macrostachys	3	-6
EBCC	terra firme	CT6s14	macrostachys	2	-1
EBCC	terra firme	CT6s15	macrostachys	1	0
EBCC	terra firme	CT7s1	macrostachys	3	1
EBCC	terra firme	CT7s2	macrostachys	5	0
EBCC	terra firme	CT7s3	macrostachys	3	1
EBCC	terra firme	CT7s4	macrostachys	5	0
EBCC	terra firme	CT7s5	macrostachys	13	1
EBCC	terra firme	CT7s6	macrostachys	7	0.5
EBCC	terra firme	CT7s7	macrostachys	7	0
EBCC	terra firme	CT7s8	macrostachys	10	1
EBCC	terra firme	CT7s9	macrostachys	5	0
EBCC	terra firme	CT7s10	macrostachys	2	1
EBCC	terra firme	CT7s11	macrostachys	3	0
EBCC	terra firme	CT7s12	0	0	0
EBCC	terra firme	CT7s13	macrostachys	6	2
EBCC	terra firme	CT7s14	macrostachys	3	3
EBCC	terra firme	CT7s15	0	0	20
EBCC	terra firme	CT8s1	macrostachys	2	1
EBCC	terra firme	CT8s2	macrostachys	2	2
EBCC	terra firme	CT8s3	macrostachys	5	10
EBCC	terra firme	CT8s4	macrostachys	5	25
EBCC	terra firme	CT8s5	0	0	13
EBCC	terra firme	CT8s6	0	0	16
EBCC	terra firme	CT8s7	0	0	-6
EBCC	terra firme	CT8s8	macrostachys	2	6
EBCC	terra firme	CT8s9	macrostachys	1	2.5
EBCC	terra firme	CT8s10	macrostachys	3	12
EBCC	terra firme	CT8s11	macrostachys	3	-4
EBCC	terra firme	CT8s12	macrostachys	4	-12
EBCC	terra firme	CT8s13	macrostachys	1	-14
EBCC	terra firme	CT8s14	macrostachys	2	-2
EBCC	terra firme	CT8s15	macrostachys	2	-1
EBCC	terra firme	CT8s16	macrostachys	4	0
EBCC	terra firme	CT9s1	0	0	0.5
EBCC	terra firme	CT9s2	macrostachys	1	3.5
EBCC	terra firme	CT9s3	0	0	15
EBCC	terra firme	CT9s4	macrostachys	2	26
EBCC	terra firme	CT9s5	0	0	6
EBCC	terra firme	CT9s6	0	0	-16
EBCC	terra firme	CT9s7	0	0	25
EBCC	terra firme	CT9s8	macrostachys	2	-11
EBCC	terra firme	CT9s9	0	0	31
EBCC	terra firme	CT9s10	0	0	30
EBCC	terra firme	CT9s11	macrostachys	2	3
EBCC	terra firme	CT9s12	0	0	-1.5
EBCC	terra firme	CT9s13	macrostachys	1	-11
EBCC	terra firme	CT9s14	0	0	3
EBCC	terra firme	CT9s15	macrostachys	6	-5.5
EBCC	terra firme	CT9s16	0	0	-5
EBCC	terra firme	CT16s1	0	0	-22
EBCC	terra firme	CT16s2	0	0	5
EBCC	terra firme	CT16s3	macrostachys	1	23
EBCC	terra firme	CT16s4	macrostachys	1	20
EBCC	terra firme	CT16s5	macrostachys	1	-16
EBCC	terra firme	CT16s6	0	0	24
EBCC	terra firme	CT16s7	0	0	8
EBCC	terra firme	CT16s8	macrostachys	4	4
EBCC	terra firme	CT16s9	macrostachys	3	5
EBCC	terra firme	CT16s10	macrostachys	2	-1
EBCC	terra firme	CT16s11	macrostachys	6	0
EBCC	terra firme	CT16s12	macrostachys	1	-3
EBCC	terra firme	CT16s13	0	0	1
EBCC	terra firme	CT16s14	macrostachys	1	-19
EBCC	terra firme	CT16s15	macrostachys	1	-9
EBCC	floodplain	CT17s1	macrostachys	1	0
EBCC	floodplain	CT17s2	macrostachys	3	1
EBCC	floodplain	CT17s3	0	0	-1
EBCC	floodplain	CT17s4	0	0	3
EBCC	floodplain	CT17s5	0	0	-1
EBCC	floodplain	CT17s6	acaulis	1	1
EBCC	floodplain	CT17s6	macrostachys	3	1
EBCC	floodplain	CT17s7	0	0	-2
EBCC	floodplain	CT17s8	macrostachys	2	0
EBCC	floodplain	CT17s9	acaulis	1	-3
EBCC	floodplain	CT17s9	macrostachys	1	-3
EBCC	floodplain	CT17s10	macrostachys	2	3
EBCC	floodplain	CT17s11	macrostachys	4	0
EBCC	floodplain	CT17s12	macrostachys	2	-1
EBCC	floodplain	CT17s13	macrostachys	5	0
EBCC	floodplain	CT17s14	0	0	-10
EBCC	floodplain	CT17s15	0	0	-5
EBCC	floodplain	CT18s1	0	0	-0.5
EBCC	floodplain	CT18s2	acaulis	3	-1
EBCC	floodplain	CT18s2	macrostachys	1	-1
EBCC	floodplain	CT18s3	0	0	-1
EBCC	floodplain	CT18s4	0	0	2
EBCC	floodplain	CT18s5	macrostachys	1	0
EBCC	floodplain	CT18s6	macrostachys	2	-1
EBCC	floodplain	CT18s7	macrostachys	1	-3
EBCC	floodplain	CT18s8	acaulis	1	-2
EBCC	floodplain	CT18s8	macrostachys	1	-2
EBCC	floodplain	CT18s9	acaulis	1	1
EBCC	floodplain	CT18s9	macrostachys	1	1
EBCC	floodplain	CT18s10	macrostachys	2	0.5
EBCC	floodplain	CT18s11	0	0	0
EBCC	floodplain	CT18s12	0	0	-0.5
EBCC	floodplain	CT18s13	0	0	0
EBCC	floodplain	CT18s14	macrostachys	4	-2
EBCC	floodplain	CT18s15	macrostachys	1	-1
LLNR	red soil	LT1s1	macrostachys	2	-7
LLNR	red soil	LT1s2	macrostachys	1	-10
LLNR	red soil	LT1s3	0	0	35
LLNR	red soil	LT1s4	0	0	6
LLNR	red soil	LT1s5	0	0	2
LLNR	red soil	LT1s6	0	0	-15
LLNR	red soil	LT1s7	0	0	-10
LLNR	red soil	LT1s8	0	0	3
LLNR	red soil	LT1s9	macrostachys	1	4
LLNR	red soil	LT1s10	0	0	4
LLNR	red soil	LT1s11	macrostachys	2	1
LLNR	red soil	LT1s12	0	0	-14
LLNR	red soil	LT1s13	0	0	-11
LLNR	red soil	LT1s14	macrostachys	1	-11
LLNR	red soil	LT1s15	0	0	14
LLNR	white soil	LT2s1	acaulis	5	-1
LLNR	white soil	LT2s2	acaulis	6	5
LLNR	white soil	LT2s3	acaulis	2	-2
LLNR	white soil	LT2s4	acaulis	3	-1
LLNR	white soil	LT2s5	acaulis	5	3
LLNR	white soil	LT2s6	acaulis	4	-1
LLNR	white soil	LT2s7	acaulis	1	0
LLNR	white soil	LT2s8	acaulis	1	-2
LLNR	white soil	LT2s9	acaulis	2	-4
LLNR	white soil	LT2s10	0	0	1
LLNR	white soil	LT2s11	acaulis	4	-1
LLNR	white soil	LT2s12	acaulis	1	1
LLNR	white soil	LT2s13	0	0	-2
LLNR	white soil	LT2s14	0	0	-3
LLNR	white soil	LT2s15	0	0	-11
LLNR	white soil	LT3s1	acaulis	9	-1
LLNR	white soil	LT3s2	acaulis	3	-4
LLNR	white soil	LT3s3	acaulis	2	-2
LLNR	white soil	LT3s4	0	0	-1
LLNR	white soil	LT3s5	acaulis	2	-2
LLNR	white soil	LT3s6	acaulis	3	2
LLNR	red soil	LT3s7	acaulis	1	-12
LLNR	red soil	LT3s8	macrostachys	2	-23
LLNR	white soil	LT3s9	0	0	3
LLNR	white soil	LT3s10	acaulis	2	-1.5
LLNR	white soil	LT3s11	acaulis	2	-4
LLNR	white soil	LT3s11	macrostachys	1	-4
LLNR	white soil	LT3s12	acaulis	2	-1.5
LLNR	white soil	LT3s13	acaulis	3	-2
LLNR	white soil	LT3s14	0	0	14
LLNR	white soil	LT3s15	0	0	-4
LLNR	red soil	LT4s1	0	0	21
LLNR	red soil	LT4s2	0	0	-5
LLNR	red soil	LT4s3	macrostachys	1	-13
LLNR	red soil	LT4s4	macrostachys	1	-12
LLNR	red soil	LT4s5	0	0	-33
LLNR	red soil	LT4s6	macrostachys	1	35
LLNR	red soil	LT4s7	0	0	11
LLNR	red soil	LT4s8	0	0	-33
LLNR	red soil	LT4s9	macrostachys	1	-31
LLNR	red soil	LT4s10	macrostachys	1	-34
LLNR	red soil	LT4s11	macrostachys	3	-26
LLNR	red soil	LT4s12	macrostachys	1	34
LLNR	red soil	LT4s13	0	0	-25
LLNR	red soil	LT4s14	0	0	-33
LLNR	red soil	LT4s15	macrostachys	1	40
LLNR	red soil	LT5s1	macrostachys	2	-18
LLNR	red soil	LT5s2	0	0	-22
LLNR	red soil	LT5s3	macrostachys	1	-7
LLNR	red soil	LT5s4	0	0	21
LLNR	red soil	LT5s5	0	0	-19
LLNR	red soil	LT5s6	macrostachys	1	-13
LLNR	red soil	LT5s7	macrostachys	1	-17
LLNR	red soil	LT5s8	macrostachys	1	-22
LLNR	red soil	LT5s9	macrostachys	1	-25
LLNR	red soil	LT5s10	0	0	5
LLNR	red soil	LT5s11	0	0	4
LLNR	red soil	LT5s12	0	0	22
LLNR	red soil	LT5s13	0	0	12
LLNR	red soil	LT5s14	0	0	21
LLNR	red soil	LT5s15	0	0	6
LLNR	red soil	LT6s1	0	0	-12
LLNR	red soil	LT6s2	0	0	-9
LLNR	red soil	LT6s3	0	0	14
LLNR	red soil	LT6s4	0	0	10
LLNR	red soil	LT6s5	0	0	2
LLNR	red soil	LT6s6	0	0	2
LLNR	red soil	LT6s7	acaulis	2	-24
LLNR	red soil	LT6s8	0	0	-26
LLNR	red soil	LT6s9	acaulis	1	-26
LLNR	red soil	LT6s10	0	0	-29
LLNR	red soil	LT6s11	0	0	-20
LLNR	red soil	LT6s12	acaulis	1	-30
LLNR	red soil	LT6s13	0	0	-20
LLNR	red soil	LT6s14	0	0	-35
LLNR	red soil	LT6s15	0	0	-24
LLNR	red soil	LT6s16	acaulis	1	35
LLNR	red soil	LT6s17	0	0	36
LLNR	red soil	LT6s18	0	0	24
LLNR	red soil	LT6s19	0	0	30
LLNR	red soil	LT6s20	acaulis	1	24
LLNR	red soil	LT6s21	acaulis	1	25
LLNR	red soil	LT6s22	0	0	30
LLNR	red soil	LT6s23	acaulis	2	0
LLNR	red soil	LT6s24	0	0	-30
LLNR	red soil	LT6s25	0	0	-31
LLNR	red soil	LT6s26	0	0	-25
LLNR	red soil	LT6s27	0	0	6
LLNR	red soil	LT6s28	0	0	-18
LLNR	red soil	LT6s29	0	0	-34
LLNR	red soil	LT6s30	0	0	-14
LLNR	red soil	LT7s1	acaulis	1	32
LLNR	red soil	LT7s2	0	0	-25
LLNR	red soil	LT7s3	0	0	-19
LLNR	red soil	LT7s4	0	0	-6
LLNR	red soil	LT7s5	acaulis	2	-8
LLNR	red soil	LT7s6	acaulis	1	4
LLNR	red soil	LT7s7	acaulis	1	9
LLNR	red soil	LT7s8	0	0	6
LLNR	red soil	LT7s9	0	0	12
LLNR	red soil	LT7s10	acaulis	1	-10
LLNR	red soil	LT7s11	acaulis	1	-2
LLNR	red soil	LT7s12	0	0	1
LLNR	red soil	LT7s13	0	0	-3
LLNR	red soil	LT7s14	acaulis	1	-8
LLNR	red soil	LT7s15	0	0	-5
LLNR	red soil	LT7s16	0	0	-7
LLNR	red soil	LT7s17	0	0	-9
LLNR	red soil	LT7s18	0	0	-17
LLNR	red soil	LT7s19	0	0	-3
LLNR	red soil	LT7s20	0	0	-2
LLNR	red soil	LT7s21	0	0	-4
LLNR	red soil	LT7s22	0	0	-12
LLNR	red soil	LT7s23	0	0	-13
LLNR	red soil	LT7s24	0	0	-15
LLNR	red soil	LT7s25	0	0	-12
LLNR	red soil	LT7s26	0	0	-11
LLNR	red soil	LT7s27	0	0	-7
LLNR	red soil	LT7s28	0	0	-4
LLNR	red soil	LT7s29	0	0	2
LLNR	white soil	LT8s1	0	0	-2
LLNR	white soil	LT8s2	0	0	-2
LLNR	white soil	LT8s3	0	0	-7
LLNR	white soil	LT8s4	0	0	-9
LLNR	white soil	LT8s5	acaulis	1	14
LLNR	white soil	LT8s6	acaulis	2	-9
LLNR	white soil	LT8s7	acaulis	1	-7
LLNR	white soil	LT8s8	acaulis	1	3
LLNR	white soil	LT8s9	0	0	0
LLNR	white soil	LT8s10	0	0	-20
LLNR	white soil	LT8s11	0	0	-15
LLNR	white soil	LT8s12	0	0	-15
LLNR	white soil	LT8s13	0	0	-8
LLNR	white soil	LT8s14	0	0	-2
LLNR	white soil	LT8s15	0	0	-8
LLNR	white soil	LT8s16	0	0	-7
LLNR	white soil	LT8s17	acaulis	1	-6
LLNR	white soil	LT8s18	0	0	2
LLNR	white soil	LT8s19	0	0	0
LLNR	white soil	LT8s20	0	0	-4
LLNR	white soil	LT8s21	0	0	-4
LLNR	white soil	LT8s22	acaulis	2	5
LLNR	white soil	LT8s23	acaulis	3	5
LLNR	white soil	LT8s24	0	0	-3
LLNR	white soil	LT8s25	0	0	-1
LLNR	white soil	LT8s26	0	0	-3
LLNR	white soil	LT8s27	0	0	-3
LLNR	white soil	LT8s28	0	0	-5
LLNR	white soil	LT8s29	acaulis	1	-6
LLNR	white soil	LT8s29	macrostachys	1	-6
LLNR	white soil	LT8s30	acaulis	2	-5
LLNR	red soil	LT9s1	macrostachys	2	22
LLNR	red soil	LT9s2	macrostachys	2	-24
LLNR	red soil	LT9s3	0	0	14
LLNR	red soil	LT9s4	acaulis	1	6
LLNR	red soil	LT9s5	0	0	5
LLNR	red soil	LT9s6	0	0	13
LLNR	red soil	LT9s7	macrostachys	2	27
LLNR	red soil	LT9s8	0	0	11
LLNR	red soil	LT9s9	0	0	-28
LLNR	red soil	LT9s10	macrostachys	3	-24
LLNR	red soil	LT9s11	0	0	-5
LLNR	red soil	LT9s12	0	0	-18
LLNR	red soil	LT9s13	macrostachys	1	-31
LLNR	red soil	LT9s14	0	0	3
LLNR	red soil	LT9s15	macrostachys	2	31
LLNR	red soil	LT9s16	macrostachys	2	18
LLNR	red soil	LT9s17	0	0	11
LLNR	red soil	LT9s18	0	0	19
LLNR	red soil	LT9s19	0	0	24
LLNR	red soil	LT9s20	0	0	-28
LLNR	red soil	LT9s21	0	0	-17
LLNR	red soil	LT9s22	0	0	-8
LLNR	red soil	LT9s23	macrostachys	1	-20
LLNR	red soil	LT9s24	0	0	-29
LLNR	red soil	LT9s25	0	0	-31
LLNR	red soil	LT9s26	0	0	-10
LLNR	red soil	LT9s27	0	0	3
LLNR	red soil	LT9s28	0	0	6
LLNR	red soil	LT9s29	0	0	13
LLNR	red soil	LT9s30	0	0	11
LLNR	white soil	LT10s1	acaulis	11	1
LLNR	white soil	LT10s2	acaulis	8	-2
LLNR	white soil	LT10s3	acaulis	6	-1
LLNR	white soil	LT10s4	acaulis	3	1
LLNR	white soil	LT10s5	acaulis	2	0
LLNR	white soil	LT10s6	acaulis	1	1
LLNR	white soil	LT10s7	acaulis	1	0
LLNR	white soil	LT10s8	acaulis	4	-9
LLNR	white soil	LT10s9	acaulis	1	6
LLNR	white soil	LT10s10	acaulis	7	1
LLNR	white soil	LT10s11	acaulis	9	1
LLNR	white soil	LT10s12	acaulis	6	1
LLNR	white soil	LT10s13	acaulis	4	-1
LLNR	white soil	LT10s14	acaulis	5	4
LLNR	white soil	LT10s15	acaulis	6	-3
LLNR	white soil	LT10s16	acaulis	6	-1
LLNR	white soil	LT10s17	acaulis	7	-1
LLNR	white soil	LT10s18	acaulis	7	0
LLNR	white soil	LT10s19	acaulis	2	-1
LLNR	white soil	LT10s20	acaulis	16	-2
LLNR	white soil	LT10s21	acaulis	3	-6
LLNR	white soil	LT10s22	acaulis	2	-12
LLNR	red soil	LT10s23	macrostachys	1	14
LLNR	white soil	LT10s24	0	0	-1
LLNR	white soil	LT10s25	acaulis	5	-4
LLNR	white soil	LT10s26	acaulis	5	9
LLNR	white soil	LT10s27	acaulis	6	5
LLNR	white soil	LT10s28	acaulis	2	2
LLNR	white soil	LT10s29	acaulis	6	2
LLNR	white soil	LT10s30	acaulis	4	1
LLNR	white soil	LT11s1	0	0	-1
LLNR	white soil	LT11s2	acaulis	1	-2
LLNR	white soil	LT11s3	macrostachys	2	1
LLNR	white soil	LT11s4	acaulis	1	1
LLNR	white soil	LT11s5	acaulis	2	-1
LLNR	white soil	LT11s6	acaulis	2	0
LLNR	white soil	LT11s7	acaulis	2	-1
LLNR	white soil	LT11s8	acaulis	1	0
LLNR	white soil	LT11s9	0	0	2
LLNR	white soil	LT11s10	acaulis	8	0
LLNR	white soil	LT11s11	acaulis	10	0
LLNR	white soil	LT11s12	acaulis	3	-4
LLNR	white soil	LT11s13	acaulis	3	-3
LLNR	white soil	LT11s14	acaulis	2	-1
LLNR	white soil	LT11s15	acaulis	2	3
LLNR	white soil	LT11s16	acaulis	1	0
LLNR	white soil	LT11s17	acaulis	5	-1
LLNR	white soil	LT11s18	acaulis	2	-1
LLNR	white soil	LT11s19	0	0	4
LLNR	white soil	LT11s20	0	0	-4
LLNR	white soil	LT11s21	acaulis	1	-6
LLNR	white soil	LT11s21	macrostachys	1	-6
LLNR	white soil	LT11s22	0	0	-1
LLNR	white soil	LT11s23	acaulis	1	-8
LLNR	white soil	LT11s24	acaulis	1	0
LLNR	white soil	LT11s25	acaulis	2	0
LLNR	white soil	LT11s26	acaulis	1	1
LLNR	white soil	LT11s27	0	0	-1
LLNR	white soil	LT11s28	acaulis	2	0
LLNR	white soil	LT11s29	0	0	0
LLNR	white soil	LT11s30	0	0	1
LLNR	white soil	LT12s1	acaulis	1	6
LLNR	white soil	LT12s2	0	0	3
LLNR	white soil	LT12s3	acaulis	4	-1
LLNR	white soil	LT12s4	0	0	0
LLNR	white soil	LT12s5	0	0	-1
LLNR	white soil	LT12s6	0	0	-5
LLNR	white soil	LT12s7	0	0	-3.5
LLNR	white soil	LT12s8	0	0	-9.5
LLNR	white soil	LT12s9	0	0	6
LLNR	white soil	LT12s10	0	0	4
LLNR	white soil	LT12s11	acaulis	1	2.5
LLNR	white soil	LT12s12	0	0	1
LLNR	white soil	LT12s13	0	0	-3
LLNR	white soil	LT12s14	0	0	-21
LLNR	white soil	LT12s15	0	0	-18
LLNR	white soil	LT12s16	0	0	-16.5
LLNR	white soil	LT12s17	0	0	-27.5
LLNR	white soil	LT12s18	macrostachys	2	20
LLNR	white soil	LT12s18	acaulis	1	20
LLNR	white soil	LT12s19	0	0	24
LLNR	white soil	LT12s20	0	0	20
LLNR	white soil	LT12s21	acaulis	1	24
LLNR	white soil	LT12s21	macrostachys	2	24
LLNR	white soil	LT12s22	0	0	24.5
LLNR	white soil	LT12s23	acaulis	5	5
LLNR	white soil	LT12s24	0	0	-1.5
LLNR	white soil	LT12s25	0	0	-1
LLNR	white soil	LT12s26	acaulis	3	-1
LLNR	white soil	LT12s27	acaulis	4	-5
LLNR	white soil	LT12s28	0	0	2
LLNR	white soil	LT12s29	0	0	6
LLNR	white soil	LT12s30	0	0	0
ACTS	floodplain	AT1s1	acaulis	16	-3
ACTS	floodplain	AT1s2	acaulis	29	0
ACTS	floodplain	AT1s3	acaulis	35	-3
ACTS	floodplain	AT1s4	acaulis	62	2
ACTS	floodplain	AT1s5	acaulis	66	0
ACTS	floodplain	AT1s6	acaulis	69	0
ACTS	floodplain	AT1s7	acaulis	1	-1
ACTS	floodplain	AT1s8	acaulis	53	-2
ACTS	floodplain	AT1s9	acaulis	58	-6
ACTS	floodplain	AT1s10	acaulis	89	0
ACTS	floodplain	AT1s11	acaulis	43	0
ACTS	floodplain	AT1s12	acaulis	59	-2
ACTS	floodplain	AT1s13	acaulis	32	-1
ACTS	floodplain	AT1s14	acaulis	50	0
ACTS	floodplain	AT1s15	acaulis	60	0
ACTS	floodplain	AT2s1	acaulis	52	-1
ACTS	floodplain	AT2s2	acaulis	46	0
ACTS	floodplain	AT2s3	acaulis	102	0
ACTS	floodplain	AT2s4	acaulis	2	11
ACTS	floodplain	AT2s4	macrostachys	9	11
ACTS	floodplain	AT3s1	acaulis	83	0
ACTS	floodplain	AT3s2	acaulis	59	0
ACTS	floodplain	AT3s3	acaulis	46	0
ACTS	floodplain	AT3s4	acaulis	36	0
ACTS	floodplain	AT3s5	acaulis	22	-2
ACTS	floodplain	AT3s6	acaulis	79	-1
ACTS	floodplain	AT3s7	acaulis	102	0
ACTS	floodplain	AT3s8	acaulis	42	0
ACTS	floodplain	AT4s1	acaulis	63	0
ACTS	floodplain	AT4s2	acaulis	35	0
ACTS	floodplain	AT4s3	acaulis	93	-1
ACTS	floodplain	AT4s4	acaulis	34	0
ACTS	floodplain	AT4s5	acaulis	6	0
ACTS	floodplain	AT4s6	acaulis	93	1
ACTS	floodplain	AT4s7	acaulis	63	3
ACTS	floodplain	AT5s1	macrostachys	4	-7
ACTS	floodplain	AT5s2	macrostachys	2	-7
ACTS	floodplain	AT5s3	macrostachys	1	-6
ACTS	floodplain	AT5s4	acaulis	1	0
ACTS	floodplain	AT5s5	acaulis	2	0
ACTS	floodplain	AT5s6	0	0	0
ACTS	floodplain	AT5s7	0	0	0
ACTS	floodplain	AT5s8	acaulis	2	0
ACTS	floodplain	AT5s9	0	0	-2
ACTS	floodplain	AT5s10	acaulis	7	0
ACTS	floodplain	AT5s11	acaulis	8	0
ACTS	floodplain	AT5s12	acaulis	8	0
ACTS	floodplain	AT5s13	acaulis	1	0
ACTS	floodplain	AT5s14	acaulis	3	1
ACTS	floodplain	AT5s15	0	0	1
ACTS	floodplain	AT6s1	acaulis	8	-3
ACTS	floodplain	AT6s2	acaulis	5	1
ACTS	floodplain	AT6s3	acaulis	4	-1
ACTS	floodplain	AT6s4	acaulis	8	0
ACTS	floodplain	AT6s5	acaulis	2	0
ACTS	floodplain	AT6s6	acaulis	15	1
ACTS	floodplain	AT6s7	acaulis	7	-1
ACTS	floodplain	AT6s8	acaulis	5	-1
ACTS	floodplain	AT7s1	acaulis	53	0
ACTS	floodplain	AT7s2	acaulis	52	2
ACTS	floodplain	AT7s3	acaulis	38	-3
ACTS	floodplain	AT7s4	acaulis	9	-7
ACTS	floodplain	AT7s5	acaulis	34	-4
ACTS	floodplain	AT7s6	acaulis	1	5
ACTS	floodplain	AT7s7	acaulis	12	2
ACTS	floodplain	AT8s1	acaulis	6	-5
ACTS	floodplain	AT8s2	acaulis	2	0
ACTS	floodplain	AT8s3	acaulis	1	-2
ACTS	floodplain	AT8s4	acaulis	29	2
ACTS	floodplain	AT8s5	acaulis	1	-1
ACTS	floodplain	AT8s6	macrostachys	3	-3
ACTS	terra firme	AT9s1	0	0	-20
ACTS	terra firme	AT9s2	macrostachys	3	-8
ACTS	terra firme	AT9s3	macrostachys	8	0
ACTS	terra firme	AT9s4	macrostachys	2	0
ACTS	terra firme	AT9s5	macrostachys	7	3
ACTS	terra firme	AT9s6	macrostachys	15	-4
ACTS	terra firme	AT9s7	macrostachys	7	10
ACTS	terra firme	AT9s8	macrostachys	9	4
ACTS	terra firme	AT9s9	macrostachys	4	3
ACTS	terra firme	AT9s10	macrostachys	8	-3
ACTS	terra firme	AT9s11	macrostachys	4	-6
ACTS	terra firme	AT9s12	macrostachys	8	-5
ACTS	terra firme	AT9s13	macrostachys	5	-14
ACTS	terra firme	AT9s14	macrostachys	6	20
ACTS	terra firme	AT9s15	macrostachys	7	-15
ACTS	terra firme	AT10s1	macrostachys	1	-1
ACTS	terra firme	AT10s2	macrostachys	4	-1
ACTS	terra firme	AT10s3	macrostachys	7	-7
ACTS	terra firme	AT10s4	macrostachys	1	-10
ACTS	terra firme	AT10s5	0	0	12
ACTS	terra firme	AT10s6	macrostachys	1	3
ACTS	terra firme	AT10s7	macrostachys	4	1
ACTS	terra firme	AT10s8	macrostachys	6	-2
ACTS	terra firme	AT10s9	macrostachys	7	0
ACTS	terra firme	AT10s10	macrostachys	4	-14
ACTS	terra firme	AT10s11	macrostachys	9	-5
ACTS	terra firme	AT10s12	macrostachys	2	3
ACTS	terra firme	AT10s13	macrostachys	1	20
ACTS	terra firme	AT10s14	macrostachys	5	11
ACTS	terra firme	AT10s15	0	0	17
ACTS	terra firme	AT11s1	macrostachys	1	-11
ACTS	terra firme	AT11s2	macrostachys	3	-9
ACTS	terra firme	AT11s3	macrostachys	1	-9
ACTS	terra firme	AT11s4	macrostachys	1	-5
ACTS	terra firme	AT11s5	macrostachys	2	9
ACTS	terra firme	AT11s6	macrostachys	4	17
ACTS	terra firme	AT11s7	macrostachys	2	8
ACTS	terra firme	AT11s8	macrostachys	1	13
ACTS	terra firme	AT11s9	macrostachys	1	9
ACTS	terra firme	AT11s10	macrostachys	1	9
ACTS	terra firme	AT11s11	0	0	3
ACTS	terra firme	AT11s12	0	0	1
ACTS	terra firme	AT11s13	macrostachys	1	0
ACTS	terra firme	AT11s14	0	0	0
ACTS	terra firme	AT11s15	macrostachys	1	1
ACTS	terra firme	AT12s1	macrostachys	1	-1
ACTS	terra firme	AT12s2	macrostachys	2	0
ACTS	terra firme	AT12s3	macrostachys	7	0
ACTS	terra firme	AT12s4	0	0	11
ACTS	terra firme	AT12s5	macrostachys	6	5
ACTS	terra firme	AT12s6	macrostachys	2	-1
ACTS	terra firme	AT12s7	macrostachys	5	-9
ACTS	terra firme	AT12s8	macrostachys	3	-2
ACTS	terra firme	AT12s9	macrostachys	1	7
ACTS	terra firme	AT12s10	macrostachys	3	5
ACTS	terra firme	AT12s11	macrostachys	9	-2
ACTS	terra firme	AT12s12	0	0	-2
ACTS	terra firme	AT12s13	macrostachys	9	9
ACTS	terra firme	AT12s14	macrostachys	1	0
ACTS	terra firme	AT12s15	macrostachys	8	-3
ACTS	terra firme	AT13s1	macrostachys	1	-3
ACTS	terra firme	AT13s2	0	0	-10
ACTS	terra firme	AT13s3	0	0	-1
ACTS	terra firme	AT13s4	0	0	-3
ACTS	terra firme	AT13s5	macrostachys	1	18
ACTS	terra firme	AT13s6	0	0	1
ACTS	terra firme	AT13s7	macrostachys	2	1
ACTS	terra firme	AT13s8	macrostachys	6	4
ACTS	terra firme	AT13s9	macrostachys	3	7
ACTS	terra firme	AT13s9	acaulis	1	7
ACTS	terra firme	AT13s10	acaulis	1	-13
ACTS	terra firme	AT13s11	0	0	-19
ACTS	terra firme	AT13s12	macrostachys	4	-7
ACTS	terra firme	AT13s13	0	0	-8
ACTS	terra firme	AT13s14	macrostachys	3	0
ACTS	terra firme	AT13s15	0	0	1
ACTS	floodplain	AT14s1	macrostachys	5	1
ACTS	floodplain	AT14s2	macrostachys	12	-1
ACTS	floodplain	AT14s3	macrostachys	3	0
ACTS	floodplain	AT14s4	macrostachys	1	0
ACTS	floodplain	AT14s5	macrostachys	3	2
