# Supplementary material for: Edaphic and light conditions of sympatric plant morphotypes in western Amazonia
Source: Biodivers Data J. 2014 May 10;(2):e1078. doi: 10.3897/BDJ.2.e1078 (PMC4040399; doi:10.3897/BDJ.2.e1078)
Supplement: Supplementary material 3 — Soil data for three Peruvian tropical forests where Geonoma macrostachys occurs [file biodiversity_data_journal-2-e1078-s003.xls]

## Sheet: Sheet1
Location	Habitat	Plot	pH	%sand	%silt	%clay	Textural class	Slope angle	Ca (lb/A)	Ca (cmol/kg)	Mg (lb/A)	Mg (cmol/kg)	P (lb/A)	P (cmol/kg)	K (lb/A)	K (cmol/kg)	Zn (lb/A)	Zn (cmol/kg)	Mn (lb/A)	Mn (cmol/kg)	Cu (lb/A)	Cu (cmol/kg)	B (lb/A)	B (cmol/kg)	Na (lb/A)	Na (cmol/kg)
EBCC	floodplain	CT1s2	6.44	62.5	30	7.5	sandy loam	1	4275	5.33308	442.5	0.910119	41.81	0.0675008	124.3	0.158951	13.81	0.0105597	118	0.10739	0.9102	0.000716129	0.7353	0.00340102	19.63	0.0426925
EBCC	floodplain	CT1s3	5.96	100	0	0	sand	1	3162	3.94461	534.7	1.09975	65.14	0.105166	98.32	0.125729	19.93	0.0152393	154	0.140153	1.083	0.000852085	0.4754	0.00219889	16.78	0.0364941
EBCC	floodplain	CT1s6	7.09	71.25	23.75	5	sandy loam	1	4245	5.29566	673.5	1.38523	211.8	0.341944	126.1	0.161253	10.05	0.00768466	115.8	0.105388	1.069	0.00084107	1.255	0.00580481	20.85	0.0453458
EBCC	floodplain	CT1s8	6.36	37.5	31.25	31.25	clay loam	2	3907	4.874	576.8	1.18634	81.79	0.132047	141.3	0.180691	7.784	0.00595198	109.5	0.0996542	0.8274	0.000650983	0.9085	0.00420213	16.92	0.0367986
EBCC	floodplain	CT2s2	7.23	22.5	42.5	35	clay loam	0	5905	7.36652	481.9	0.991156	62.28	0.100549	137.5	0.175831	5.155	0.00394173	110.8	0.100837	0.7584	0.000596696	5.369	0.0248335	33.88	0.0736842
EBCC	floodplain	CT2s4	7.74	13.75	41.25	45	silty clay	1.5	7001	8.73378	376	0.773344	77.85	0.125686	119	0.152174	4.96	0.00379263	124	0.11285	0.8757	0.000688985	6.582	0.030444	31.3	0.0680731
EBCC	floodplain	CT2s8	6.5	18.75	37.5	43.75	clay	1	5755	7.17939	446.8	0.918963	41.25	0.0665967	127.4	0.162916	5.449	0.00416654	129	0.117401	0.8481	0.00066727	1.905	0.00881129	28.8	0.0626359
EBCC	floodplain	CT2s9	6.37	18.75	31.25	50	clay	0	4508	5.62375	457.8	0.941588	33.72	0.0544398	157.3	0.201151	4.515	0.00345236	120	0.10921	1.862	0.00146499	3.593	0.0166189	32.19	0.0700087
EBCC	floodplain	CT2s10	6.09	15	35	50	clay	0	4719	5.88698	478.5	0.984163	48.7	0.0786245	144.3	0.184527	6.053	0.00462838	133.8	0.121769	1.324	0.0010417	4.113	0.0190241	34.93	0.0759678
EBCC	floodplain	CT2s11	6.51	18.75	33.75	47.5	clay	1	5457	6.80763	672.3	1.38276	29.2	0.0471424	149.5	0.191176	8.433	0.00644823	192.5	0.175191	0.4963	0.00039048	7.101	0.0328446	37.02	0.0805133
EBCC	floodplain	CT2s14	6.38	25	25	50	clay	0	4470	5.57635	562.4	1.15673	42.11	0.0679851	211.2	0.270077	4.832	0.00369475	113.3	0.103112	1.869	0.0014705	3.464	0.0160222	26.52	0.0576773
EBCC	floodplain	CT2s15	6.28	25	26.25	48.75	clay	1.5	4633	5.77969	663.8	1.36528	23.05	0.0372134	145.5	0.186061	4.839	0.00370011	145	0.131962	1.055	0.000830055	4.503	0.0208279	34.04	0.0740322
EBCC	floodplain	CT3s2	6.97	42.5	26.25	31.25	clay loam	0	5372	6.7016	951.5	1.95701	78.09	0.126074	108.1	0.138235	8.347	0.00638247	144.3	0.131325	0.2479	0.000195043	1.168	0.00540241	20.73	0.0450848
EBCC	floodplain	CT3s3	6.53	33.75	28.75	37.5	clay loam	0	4316	5.38423	888.7	1.82785	42.6	0.0687762	160	0.204604	6.281	0.00480272	139.8	0.12723	0.6135	0.000482691	0.9085	0.00420213	22.4	0.0487168
EBCC	floodplain	CT3s4	7.43	40	31.25	28.75	clay loam	2	6374	7.9516	1071	2.2028	131.5	0.212302	97.03	0.124079	4.802	0.00367182	107.2	0.097561	0.3721	0.000292762	1.428	0.006605	68.08	0.148064
EBCC	floodplain	CT3s5	6.94	33.75	26.25	40	clay	0	5881	7.33658	797.3	1.63986	48.12	0.0776881	114.3	0.146164	6.404	0.00489677	86.75	0.0789498	0.5514	0.000433832	1.255	0.00580481	33.24	0.0722923
EBCC	floodplain	CT3s9	6.69	35	30	35	clay loam	0	5036	6.28244	730.6	1.50267	51.12	0.0825315	108.5	0.138747	9.754	0.00745833	157	0.142883	0.9584	0.000754052	1.082	0.00500463	27.93	0.0607438
EBCC	floodplain	CT3s11	6.9	40	30	30	clay loam	1	6557	8.17989	640.4	1.31715	87.37	0.141056	154.7	0.197826	10.49	0.0080211	122	0.11103	0.4066	0.000319906	1.948	0.00901018	25.78	0.0560679
EBCC	floodplain	CT3s13	6.91	46.25	26.25	27.5	sandy clay loam	1	5525	6.89247	597.6	1.22912	58.07	0.093752	119.6	0.152941	9.545	0.00729852	163.8	0.149072	0.5101	0.000401338	1.168	0.00540241	20.21	0.0439539
EBCC	floodplain	CT3s15	6.86	35	30	35	clay loam	1	4619	5.76223	662.3	1.3622	100.1	0.161608	108.7	0.139003	4.627	0.003538	181	0.164725	0.924	0.000726987	0.9085	0.00420213	20.69	0.0449978
EBCC	floodplain	CT3s3out	6.76	27.4	33.27	39.32	clay loam	0	6576	8.20359	831.6	1.71041	64.75	0.104537	118.3	0.151279	5.905	0.00451522	117	0.10648	0.3652	0.000287333	1.125	0.00520352	39.09	0.0850152
EBCC	floodplain	CT3s7out	7.37	30	27.5	42.5	clay	1	7261	9.05813	1023	2.10407	120.4	0.194382	157.7	0.201662	6.766	0.00517357	69.24	0.0630142	0.2962	0.000233045	5.542	0.0256337	73.83	0.16057
EBCC	floodplain	CT4s2	6.48	16.25	33.75	50	clay	1.5	5282	6.58932	576.1	1.1849	57.91	0.0934937	169.3	0.216496	5.97	0.00456492	144	0.131052	1.29	0.00101495	4.676	0.0216281	34.61	0.0752719
EBCC	floodplain	CT4s5	7.14	17.5	38.75	43.75	clay	0	6307	7.86801	690.1	1.41937	75.98	0.122667	187.6	0.239898	5.588	0.00427282	132	0.120131	0.6549	0.000515264	4.546	0.0210268	31.08	0.0675946
EBCC	floodplain	CT4s11	5.58	16.25	28.75	55	clay	2	4713	5.87949	628	1.29165	35.69	0.0576203	177.9	0.227494	3.819	0.00292017	98.01	0.0891973	1.283	0.00100944	3.29	0.0152174	39.05	0.0849282
EBCC	floodplain	CT4s4out	6.82	13.75	41.25	45	silty clay	0	6145	7.66592	615.2	1.26532	74.12	0.119664	179.4	0.229412	6.698	0.00512158	144.3	0.131325	1.048	0.000824548	1.125	0.00520352	26.61	0.057873
EBCC	floodplain	CT5s2	7.66	20	41.25	38.75	clay loam	0	5210	6.4995	439	0.902921	104.2	0.168227	118.4	0.151407	5.55	0.00424377	118.3	0.107663	1.359	0.00106924	5.542	0.0256337	34.33	0.0746629
EBCC	floodplain	CT17s2	6.39	57.5	22.5	20	sandy clay loam	1	4193	5.23079	439.7	0.90436	96.95	0.156522	83.73	0.107072	7.674	0.00586787	156.5	0.142428	1.007	0.00079229	4.07	0.0188252	27.05	0.0588299
EBCC	floodplain	CT17s6	6.47	40	25	35	clay loam	1	4213	5.25574	393.8	0.809955	36.5	0.058928	106.3	0.135934	4.812	0.00367946	121.3	0.110393	0.9171	0.000721558	6.148	0.0284366	26.87	0.0584385
EBCC	floodplain	CT17s8	6.18	45	22.5	32.5	sandy clay loam	2	2890	3.60529	473	0.972851	16.47	0.0265902	120.5	0.154092	7.044	0.00538614	172.5	0.156989	1.207	0.000949646	5.499	0.0254348	37.98	0.0826011
EBCC	floodplain	CT17s12	6.55	30	31.25	38.75	clay loam	1	6290	7.84681	725.3	1.49177	27.43	0.0442848	118.7	0.15179	7.221	0.00552149	157	0.142883	0.5032	0.000395909	4.46	0.020629	32.38	0.0704219
EBCC	floodplain	CT17s13	6.48	50	20	30	sandy clay loam	0	3672	4.58084	389	0.800082	42.58	0.0687439	89.71	0.114719	8.171	0.0062479	171	0.155624	1.421	0.00111802	4.026	0.0186216	28.49	0.0619617
EBCC	floodplain	CT17s15out	5.59	51.25	22.5	26.25	sandy clay loam	5	3126	3.8997	429.1	0.882559	22.53	0.0363739	108.6	0.138875	3.562	0.00272366	126.3	0.114944	1.49	0.00117231	0.3888	0.00179833	28.21	0.0613528
EBCC	floodplain	CT17s9out	5.7	21.52	20.25	58.23	clay	3	4743	5.91692	556.9	1.14541	43.02	0.0694543	195	0.249361	3.804	0.0029087	181.5	0.16518	1.545	0.00121558	0.5187	0.00239917	33.08	0.0719443
EBCC	terra firme	CT6s1	4.04	62.5	13.75	23.75	sandy clay loam	5.5	115.3	0.143837	31.48	0.064747	13.76	0.022215	74.87	0.0957417	21.36	0.0163328	309.3	0.281489	1.227	0.000965382	0.0857	0.000396392	12.08	0.0262723
EBCC	terra firme	CT6s6	5.08	73.75	16.25	10	sandy loam	10	381.9	0.476422	171.2	0.352118	9.461	0.0152745	99.91	0.127762	23.31	0.0178238	418.1	0.380506	1.041	0.00081904	0.2156	0.000997225	13.99	0.0304263
EBCC	terra firme	CT6s7	5.43	77.5	16.25	6.25	sandy loam	0	854.8	1.06637	160.4	0.329905	12.1	0.019535	92.62	0.11844	23.21	0.0177474	585.4	0.532763	0.4894	0.000385051	0.3455	0.00159806	9.987	0.0217203
EBCC	terra firme	CT6s10	4.73	83.17	8.42	8.42	loamy sand	0	263	0.328094	64.23	0.132106	7.246	0.0116984	63.49	0.0811893	11.94	0.00912984	524.7	0.477521	0.717	0.000564123	0.2156	0.000997225	22.57	0.0490866
EBCC	terra firme	CT6s11	4.66	82.5	10	7.5	loamy sand	5	162.9	0.203219	59.72	0.12283	6.891	0.0111253	81.73	0.104514	12.05	0.00921395	356.9	0.324809	0.5238	0.000412116	0.1723	0.000796947	9.775	0.0212592
EBCC	terra firme	CT6s13	4.31	67.5	15	17.5	sandy loam	6	159.5	0.198977	47.25	0.0971822	6.702	0.0108201	97.81	0.125077	12.74	0.00974155	768	0.698944	0.9033	0.0007107	0.1723	0.000796947	11.98	0.0260548
EBCC	terra firme	CT6s15	4.79	75	15	10	sandy loam	0	322.9	0.402819	89.05	0.183155	9.36	0.0151114	85.07	0.108785	17.44	0.0133354	493.73	0.449336	0.8169	0.000642722	0.2012	0.00093062	13.4	0.0291431
EBCC	terra firme	CT7s3	5.33	62.5	27.5	10	sandy loam	1	954.1	1.19024	97.07	0.19965	17.94	0.0289635	34.11	0.0436189	15.66	0.0119743	308.6	0.280852	2.131	0.00167663	3.42	0.0158187	14.52	0.0315789
EBCC	terra firme	CT7s4	5.33	72.5	20	7.5	sandy loam	0	491.3	0.612899	65.29	0.134286	11.94	0.0192767	33.21	0.042468	7.771	0.00594204	306.8	0.279214	1.517	0.00119355	3.334	0.0154209	12.3	0.0267508
EBCC	terra firme	CT7s6	4.4	65	20	15	sandy loam	0.5	133.5	0.166542	30.01	0.0617236	15.12	0.0244107	38.58	0.049335	4.902	0.00374828	244.1	0.222151	1.034	0.000813533	2.771	0.0128168	12.14	0.0264028
EBCC	terra firme	CT7s7	4.3	66.25	21.25	12.5	sandy loam	0	191.6	0.239022	27.27	0.056088	13.25	0.0213917	33.77	0.0431841	5.403	0.00413137	397.6	0.361849	1.434	0.00112825	2.294	0.0106105	15.45	0.0336016
EBCC	terra firme	CT7s8	4.34	57.5	26.25	16.25	sandy loam	1	164.5	0.205215	32.4	0.0666392	10.29	0.0166129	34.07	0.0435678	3.975	0.00303946	360.4	0.327994	0.924	0.000726987	2.987	0.0138159	17.72	0.0385385
EBCC	terra firme	CT7s13	4.27	57.5	28.75	13.75	sandy loam	2	199.7	0.249127	42.69	0.0878034	13.98	0.0225702	50.88	0.0650639	8.396	0.00641994	31.01	0.0282217	0.4342	0.000341621	1.515	0.0070074	16.19	0.035211
EBCC	terra firme	CT8s2	4.1	60	25	15	sandy loam	2	169.2	0.211078	28.57	0.0587618	7.44	0.0120116	46.24	0.0591304	11.26	0.00860988	8.5	0.00773571	0.2755	0.000216758	2.424	0.0112118	20.2	0.0439321
EBCC	terra firme	CT8s3	4.28	75	12.5	12.5	sandy loam	10	198.6	0.247754	37.18	0.0764706	7.007	0.0113126	55.17	0.0705499	8.297	0.00634424	14.75	0.0134237	0.241	0.000189614	2.944	0.013617	25.12	0.0546324
EBCC	terra firme	CT8s4	4.39	78.75	11.25	10	sandy loam	25	252.8	0.315369	34.34	0.0706294	5.278	0.00852115	42.92	0.0548849	4.413	0.00337437	15	0.0136513	0.0548	4.31157e-05	4.893	0.0226318	23.24	0.0505437
EBCC	terra firme	CT8s8	6.84	43.75	18.75	37.5	clay loam	6	3798	4.73802	549.5	1.13019	9.667	0.015607	136.5	0.174552	3.697	0.00282688	127.3	0.115854	0	0	8.574	0.0396577	28.04	0.060983
EBCC	terra firme	CT8s12	4.9	87.5	5	7.5	loamy sand	12	722.5	0.901322	156.8	0.322501	8.712	0.0140652	83.72	0.107059	6.574	0.00502676	168.5	0.153349	0.3445	0.000271046	7.967	0.0368501	24.34	0.0529361
EBCC	terra firme	CT8s13	4.22	86.25	8.75	5	loamy sand	14	313	0.390469	56.12	0.115426	4.828	0.00779464	53.98	0.0690281	10.35	0.00791405	38.76	0.0352748	0.0824	6.48308e-05	7.058	0.0326457	20.78	0.0451936
EBCC	terra firme	CT9s4	4.03	77.5	13.75	8.75	loamy sand	26	97.69	0.121869	32.5	0.0668449	4.382	0.00707459	64.92	0.0830179	7.48	0.00571953	2.998	0.00272843	0.2272	0.000178757	4.979	0.0230296	23.83	0.0518269
EBCC	terra firme	CT9s8	5	77.5	11.25	11.25	sandy loam	11	663.8	0.828094	86.96	0.178856	3.915	0.00632063	76.57	0.0979156	12.91	0.00987154	114	0.10375	0.1651	0.000129898	4.589	0.0212257	29.88	0.0649848
EBCC	terra firme	CT9s13	4.74	83.75	7.5	8.75	loamy sand	11	213.8	0.266717	94.5	0.194364	3.5	0.00565063	69.55	0.0889386	8.814	0.00673956	54.01	0.0491536	0.3583	0.000281904	5.023	0.0232331	23.76	0.0516746
EBCC	terra firme	CT9s15	4.25	77.5	10	12.5	sandy loam	5.5	82.4	0.102794	19.85	0.0408268	2.154	0.00347756	38.95	0.0498082	9.111	0.00696666	9.75	0.00887332	0.448	0.000352478	2.944	0.013617	20.75	0.0451283
EBCC	terra firme	CT16s4	4.76	91.25	5	3.75	sand	20	135.2	0.168663	45.53	0.0936446	6.113	0.00986923	61.67	0.0788619	8.601	0.00657669	33.01	0.0300419	0.379	0.00029819	2.424	0.0112118	18.64	0.0405394
EBCC	terra firme	CT16s9	4.03	61.25	18.75	20	sandy clay loam	5	104	0.129741	36.53	0.0751337	6.991	0.0112867	62.41	0.0798082	15.45	0.0118137	10	0.00910084	0.4066	0.000319906	1.212	0.00560592	19.01	0.0413441
EBCC	terra firme	CT16s11	4.02	56.25	25	18.75	sandy loam	0	83.79	0.104528	31.02	0.0638009	5.242	0.00846303	44.63	0.0570716	8.497	0.00649717	4.248	0.00386604	0.3928	0.000309048	1.688	0.00780759	21.07	0.0458243
EBCC	terra firme	CT16s14	4.28	82.5	8.75	8.75	loamy sand	19	155	0.193363	50.79	0.104463	7.885	0.0127301	111.5	0.142583	9.019	0.00689631	7.999	0.00727976	0.2203	0.000173328	5.196	0.0240333	22.25	0.0483906
EBCC	terra firme	CT16s15	3.87	63.75	13.75	22.5	sandy clay loam	9	87.83	0.109568	34.65	0.071267	6.984	0.0112754	91.63	0.117174	8.909	0.0068122	10.5	0.00955588	0.3997	0.000314477	2.121	0.00981036	19.99	0.0434754
EBCC	floodplain	CT15s6	7.32	33.75	33.75	32.5	clay loam	0	5326	6.64421	389.6	0.801316	102.1	0.164837	111.4	0.142455	5.846	0.0044701	128.8	0.117219	1.179	0.000927616	0.9085	0.00420213	22.51	0.0489561
EBCC	floodplain	CT15s11	7.48	26.25	43.75	30	clay loam	0	4939	6.16143	398.2	0.819005	63.06	0.101808	137.4	0.175703	4.307	0.00329332	121.5	0.110575	1.517	0.00119355	0.692	0.00320074	24.49	0.0532623
EBCC	floodplain	CT18s2	6.71	40	30	30	clay loam	1	4928	6.1477	1061	2.18223	37.33	0.060268	119.1	0.152302	17.55	0.0134195	199.8	0.181835	0.9722	0.00076491	0.9951	0.00460268	21.16	0.04602
EBCC	floodplain	CT18s5	6.37	20	30	50	clay	0	4103	5.11851	667.5	1.37289	14.33	0.0231353	158.3	0.20243	4.931	0.00377045	97.26	0.0885147	1.283	0.00100944	0.5621	0.00259991	23.91	0.0520009
EBCC	floodplain	CT18s6	6.28	18.75	28.75	52.5	clay	1	4713	5.87949	830.9	1.70897	15.25	0.0246206	167	0.213555	9.558	0.00730846	100.8	0.0917364	1.331	0.00104721	0.5621	0.00259991	30.54	0.0664202
EBCC	floodplain	CT18s8	6.23	16.25	32.5	51.25	clay	2	3990	4.97754	669.1	1.37618	9.975	0.0161043	127.3	0.162788	5.131	0.00392338	117.3	0.106753	1.193	0.000938631	0.4754	0.00219889	27.65	0.0601348
EBCC	floodplain	CT18s9	6.19	18.75	31.25	50	clay	1	3704	4.62076	711.2	1.46277	7.803	0.0125977	129.4	0.165473	6.56	0.00501606	143	0.130142	1.352	0.00106373	0.4321	0.00199861	24.87	0.0540887
EBCC	floodplain	CT18s14	7.55	16.25	33.75	50	clay	2	7512	9.37126	971.8	1.99877	58.25	0.0940426	168.8	0.215857	13.3	0.0101698	138.3	0.125865	0	0	3.204	0.0148196	18.17	0.0395172
EBCC	floodplain	6~1440	6.85	13.75	41.25	45	silty clay	3	5366	6.69411	535.6	1.1016	73.26	0.118276	145.4	0.185934	4.331	0.00331167	128.8	0.117219	1.014	0.000797797	4.719	0.021827	26.27	0.0571335
EBCC	floodplain	Cadle~100	6.42	8.75	27.5	63.75	clay	0	5275	6.58059	529.7	1.08947	17.19	0.0277527	138.2	0.176726	5.954	0.00455268	269.8	0.245541	0.9929	0.000781196	4.416	0.0204255	37.93	0.0824924
EBCC	floodplain	52~250a	6.49	25	27.5	47.5	clay	1	4640	5.78842	567	1.16619	45.8	0.0739425	155.5	0.198849	4.519	0.00345542	144	0.131052	0.8757	0.000688985	0.692	0.00320074	20.75	0.0451283
EBCC	floodplain	52~250b	6.61	40	27.5	32.5	clay loam	1	4918	6.13523	469.2	0.965035	63.57	0.102632	121.5	0.155371	5.642	0.00431412	111.8	0.101747	1.448	0.00113926	0.6054	0.00280019	24.68	0.0536755
EBCC	floodplain	28~600	7.25	42.5	35	22.5	loam	0	5472	6.82635	443.9	0.912999	77.08	0.124443	107.3	0.137212	7.491	0.00572794	98.26	0.0894248	1.455	0.00114477	0.7353	0.00340102	22.9	0.0498043
EBCC	floodplain	5~450	6.57	20	23.75	56.25	clay	2	5855	7.30414	743.8	1.52982	46.63	0.0752825	155.7	0.199105	18.87	0.0144288	122.3	0.111303	1.234	0.000970889	0.9951	0.00460268	35.92	0.0781209
EBCC	floodplain	9~585	6.25	38.75	18.75	42.5	clay	4	4855	6.05664	631.9	1.29967	11.73	0.0189377	110	0.140665	10.26	0.00784524	89.26	0.0812341	0.6963	0.000547836	0.8219	0.00380157	30.12	0.0655067
EBCC	floodplain	10~950	6.28	27.5	22.5	50	clay	2	4520	5.63872	611.8	1.25833	35.58	0.0574427	111	0.141944	5.651	0.004321	53.75	0.048917	2.035	0.0016011	0.4321	0.00199861	32.61	0.0709221
EBCC	floodplain	5~945	6.49	22.5	20	57.5	clay	1	6715	8.377	798.9	1.64315	53.8	0.0868582	141.3	0.180691	13.27	0.0101468	42.49	0.0386695	0.2893	0.000227616	1.082	0.00500463	29.12	0.0633319
EBCC	floodplain	8~075	6.43	32.5	23.75	43.75	clay	0	4955	6.18139	491.3	1.01049	24.35	0.0393122	121.8	0.155754	8.098	0.00619208	107.5	0.097834	0.4894	0.000385051	0.6487	0.00300046	28.08	0.06107
EBCC	floodplain	6~1500	6.62	32.5	35	32.5	clay loam	0	4867	6.07161	504.7	1.03805	52.48	0.0847272	115.9	0.14821	8.612	0.0065851	87.26	0.0794139	2.379	0.00187175	0.6487	0.00300046	30.09	0.0654415
EBCC	floodplain	5~1648	7.61	20	35	45	clay	1	8031	10.0187	590.1	1.2137	79.36	0.128124	102	0.130435	7.544	0.00576847	113.5	0.103295	0.2548	0.000200472	1.775	0.00820999	27.27	0.0593084
EBCC	floodplain	9~975	6.38	43.75	23.75	32.5	clay loam	4	5158	6.43463	599.9	1.23385	48.84	0.0788505	99.29	0.126969	8.831	0.00675256	49	0.0445941	1.076	0.000846577	0.6054	0.00280019	27.02	0.0587647
EBCC	floodplain	9~876	7.11	40	22.5	37.5	clay loam	2	5893	7.35155	1298	2.66968	93.11	0.150323	70.97	0.0907545	9.514	0.00727481	79.23	0.0721059	0.7032	0.000553265	0.8652	0.00400185	34.57	0.0751849
EBCC	floodplain	59~1035	6.27	75	7.5	17.5	sandy loam	2	3181	3.96831	374.6	0.770465	15.15	0.0244592	145.4	0.185934	18.9	0.0144518	85.51	0.0778213	0.924	0.000726987	0.4754	0.00219889	15.63	0.033993
EBCC	floodplain	cadle~50	6.11	11.25	26.25	62.5	clay	0	4866	6.07036	699.5	1.43871	10.34	0.0166936	100.9	0.129028	7.191	0.00549855	137.5	0.125137	1.255	0.000987411	0.5187	0.00239917	28.1	0.0611135
EBCC	floodplain	11~1150	7.13	22.5	21.25	56.25	clay	0	7610	9.49351	689.6	1.41835	46.65	0.0753148	131.7	0.168414	6.727	0.00514375	134	0.121951	0.0686	5.39732e-05	1.991	0.00920907	25.82	0.0561548
LLNR	red soil	LT1s1	3.97	60	16.25	23.75	sandy clay loam	7	93.27	0.116355	47.84	0.0983957	3.237	0.00522603	108.7	0.139003	15.25	0.0116608	10.25	0.00932836	1.745	0.00137293	1.601	0.00740518	35.8	0.0778599
LLNR	red soil	LT1s2	4.26	55	15	30	sandy clay loam	32	130.3	0.16255	67.62	0.139079	10.27	0.0165806	135.6	0.173402	14.34	0.010965	32.51	0.0295868	1.6	0.00125885	2.338	0.0108141	64.15	0.139517
LLNR	red soil	LT1s9	4.01	43.75	22.5	33.75	clay loam	29	155.9	0.194486	75.68	0.155656	9.786	0.0157992	141.4	0.180818	11.37	0.00869399	22.25	0.0202494	1.855	0.00145948	2.511	0.0116142	38.18	0.0830361
LLNR	red soil	LT1s11	4.1	62.5	10	27.5	sandy clay loam	28	61.84	0.0771457	33.85	0.0696216	2.763	0.00446077	78.57	0.100473	13.72	0.0104909	5.249	0.00477703	1.897	0.00149253	3.204	0.0148196	23.92	0.0520226
LLNR	red soil	LT1s14	4.51	47.5	20	32.5	sandy clay loam	19	82.96	0.103493	53.64	0.110325	4.992	0.00805941	107.7	0.137724	14.33	0.0109573	10.75	0.0097834	1.717	0.0013509	3.117	0.0144172	46.95	0.10211
LLNR	white soil	LT2s1	4.52	87.5	8.75	3.75	sand	1	73.32	0.0914671	21.06	0.0433155	4.869	0.00786083	49.65	0.063491	11.46	0.00876281	1.748	0.00159083	0	0	2.641	0.0122155	22.01	0.0478686
LLNR	white soil	LT2s4	4.54	67.5	20	12.5	sandy loam	1	67.91	0.0847181	20.93	0.0430481	2.653	0.00428318	43.9	0.0561381	11.16	0.00853341	0	0	0.1513	0.00011904	2.554	0.0118131	28.18	0.0612875
LLNR	white soil	LT2s6	4.45	81.25	13.75	5	loamy sand	1	50.46	0.0629491	12.05	0.024784	4.432	0.00715531	15.05	0.0192455	18.11	0.0138477	0.2477	0.000225428	0	0	2.857	0.0132146	15.57	0.0338625
LLNR	white soil	LT2s9	4.6	77.5	17.5	5	loamy sand	4	104.8	0.130739	20.78	0.0427396	6.597	0.0106506	29.06	0.0371611	11.67	0.00892338	2.748	0.00250091	0.1168	9.18961e-05	2.727	0.0126133	28.86	0.0627664
LLNR	white soil	LT2s12	3.99	70	16.25	13.75	sandy loam	1	71.1	0.0886976	25.51	0.0524681	2.678	0.00432354	62.86	0.0803836	12.79	0.00977978	0	0	0	0	2.078	0.00961147	30.35	0.066007
LLNR	white soil	LT3s1	4.6	78.75	13.75	7.5	loamy sand	1	49.9	0.0622505	13.13	0.0270053	7.473	0.0120649	30.92	0.0395396	17.4	0.0133048	0.4977	0.000452949	0.0824	6.48308e-05	4.286	0.0198242	28.13	0.0611788
LLNR	white soil	LT3s3	4.85	82.5	10	7.5	loamy sand	2	45.03	0.0561751	12.19	0.025072	3.997	0.00645302	28.11	0.0359463	11.46	0.00876281	0.2477	0.000225428	0	0	3.074	0.0142183	21.19	0.0460853
LLNR	white soil	LT3s13	4.37	80	7.5	12.5	loamy sand	2	50.09	0.0624875	14.61	0.0300494	0.4796	0.000774298	37.33	0.0477366	10.64	0.0081358	0	0	0.0479	3.76869e-05	2.901	0.0134181	27.2	0.0591562
LLNR	red soil	LT3s8	4.52	72.5	12.5	15	sandy loam	23	52.68	0.0657186	24.03	0.0494241	0.9094	0.0014682	58.36	0.0746292	7.17	0.00548249	2.998	0.00272843	0.1031	8.11172e-05	2.944	0.013617	30.82	0.0670291
LLNR	white soil	LT3s11	3.98	80	11.25	8.75	loamy sand	4	88.78	0.110753	30.9	0.0635541	2.834	0.0045754	82.35	0.105307	10.63	0.00812815	1.121	0.0010202	0	0	2.742	0.0126827	36.31	0.0789691
LLNR	red soil	LT4s3	4.09	62.5	22.5	15	sandy loam	29	197.2	0.246008	80.76	0.166104	7.648	0.0123474	112.43	0.143772	16.75	0.0128078	49.2	0.0447761	1.307	0.00102832	3.216	0.0148751	39.98	0.0869508
LLNR	red soil	LT4s4	4.01	66.5	21	12.5	sandy loam	25	111.8	0.139471	68.1	0.140066	9.529	0.0153842	116.9	0.149488	20.59	0.015744	30.03	0.0273298	2.28	0.00179386	2.699	0.0124838	48.19	0.104806
LLNR	red soil	LT4s6	4.24	61	15	24	sandy clay loam	35	193.9	0.241891	82.66	0.170012	7.466	0.0120536	111.96	0.143171	17.52	0.0133965	48.77	0.0443848	1.316	0.00103541	3.145	0.0145467	40.7	0.0885167
LLNR	red soil	LT4s9	4.36	55	25	20	sandy clay loam	31	170.6	0.212824	63.26	0.130111	4.862	0.00784953	72.13	0.0922379	9.74	0.00744762	67.93	0.061822	0.7998	0.000629268	3.396	0.0157077	30.99	0.0673989
LLNR	red soil	LT4s10	4.23	60	22.5	17.5	sandy loam	34	374.5	0.467191	134.9	0.277458	8.809	0.0142218	130.9	0.167391	22.28	0.0170362	60.07	0.0546687	1.392	0.0010952	3.831	0.0177197	40.46	0.0879948
LLNR	red soil	LT4s11	4.12	35	25	40	clay loam	26	118.8	0.148204	64.38	0.132415	6.665	0.0107604	127.9	0.163555	17.46	0.0133507	37.05	0.0337186	0.7924	0.000623446	2.655	0.0122803	43.17	0.0938886
LLNR	red soil	LT4s12	4.14	39	31	30	clay loam	34	213.6	0.266467	71.26	0.146565	8.556	0.0138134	114.8	0.146803	12.91	0.00987154	51.34	0.0467237	1.261	0.000992132	3.568	0.0165032	35.9	0.0780774
LLNR	red soil	LT4s15	4.82	61.25	21.25	17.5	sandy loam	40	2237	2.79067	537.6	1.10572	9.17	0.0148046	121.4	0.155243	11.03	0.00843401	265.5	0.241627	0	0	2.917	0.0134921	45.03	0.0979339
LLNR	red soil	LT5s1	4.17	36.25	30	33.75	clay loam	18	305	0.380489	67.5	0.138832	2.115	0.00341459	101.8	0.130179	17.69	0.0135265	12.07	0.0109847	1.125	0.00088513	2.96	0.013691	61.34	0.133406
LLNR	red soil	LT5s3	4.35	37.5	20	42.5	clay	7	174	0.217066	82.91	0.170527	3.695	0.00596545	118.9	0.152046	17.46	0.0133507	10.94	0.00995632	0	0	2.699	0.0124838	55.19	0.12003
LLNR	red soil	LT5s6	4.15	35	20	45	clay	13	145.9	0.182011	59.08	0.121514	2.358	0.00380691	104.6	0.13376	13.75	0.0105138	9.597	0.00873407	0.4464	0.00035122	2.934	0.0135708	43.49	0.0945846
LLNR	red soil	LT5s7	4.06	37.5	18.75	43.75	clay	17	105.6	0.131737	58.9	0.121144	3.221	0.00520019	115.1	0.147187	13.99	0.0106974	7.576	0.00689479	0.0524	4.12274e-05	3.657	0.0169149	43.91	0.095498
LLNR	red soil	LT5s8	3.97	45	30	25	loam	22	78.77	0.098266	42.3	0.0870012	0.4921	0.000794479	87.76	0.112225	8.511	0.00650788	4.77	0.0043411	0.2596	0.000204249	2.612	0.0120814	36.23	0.0787951
LLNR	red soil	LT5s9	4.8	57.5	11.25	31.25	sandy clay loam	25	65.89	0.0821981	43.81	0.090107	2.266	0.00365838	99.48	0.127212	11.08	0.00847224	12.63	0.0114944	0.3484	0.000274115	2.742	0.0126827	20.8	0.0452371
LLNR	red soil	LT6s7	4.04	62.5	13.75	23.75	sandy clay loam	24	109.2	0.136228	56.29	0.115775	3.561	0.00574911	117	0.149616	14.55	0.0111256	11.79	0.0107299	0.6222	0.000489536	3.047	0.0140934	36.63	0.0796651
LLNR	red soil	LT6s9	4	53.75	16.25	30	sandy clay loam	26	100.8	0.125749	68.79	0.141485	6.281	0.0101405	133.1	0.170205	13.44	0.0102768	12.35	0.0112395	0.5112	0.000402203	2.264	0.0104718	46.61	0.10137
LLNR	red soil	LT6s12	4.11	48.75	18.75	32.5	sandy clay loam	30	93.24	0.116317	47.65	0.0980049	5.646	0.00911527	104.7	0.133887	12.2	0.00932864	7.858	0.00715144	1.444	0.00113611	3.047	0.0140934	36.95	0.080361
LLNR	red soil	LT6s16	4.49	57.5	20	22.5	sandy clay loam	35	511.8	0.638473	121.5	0.249897	3.977	0.00642073	116.1	0.148465	7.743	0.00592063	27.5	0.0250273	0.8146	0.000640913	3.657	0.0169149	39.16	0.0851675
LLNR	red soil	LT6s20	3.95	33.75	26.25	40	clay loam	24	206.8	0.257984	94.01	0.193357	3.48	0.00561834	148.1	0.189386	14.56	0.0111332	50.52	0.0459774	1.074	0.000845004	2.83	0.0130897	37.45	0.0814485
LLNR	red soil	LT7s1	4.35	60	12.5	27.5	sandy clay loam	32	267.8	0.334082	51.98	0.106911	4.871	0.00786406	104.7	0.133887	7.505	0.00573865	71.3	0.064889	0.6444	0.000507002	3.047	0.0140934	39.68	0.0862984
LLNR	red soil	LT7s5	4.28	57.5	17.5	25	sandy clay loam	8	122.9	0.153318	54.64	0.112382	0.9051	0.00146125	102.8	0.131458	10.41	0.00795993	10.38	0.00944667	0.452	0.000355625	2.655	0.0122803	43.56	0.0947368
LLNR	red soil	LT7s7	4.09	45	26.25	28.75	sandy clay loam	9	338.7	0.42253	103.9	0.213698	3.154	0.00509202	140.1	0.179156	11.32	0.00865576	34.52	0.0314161	0.4372	0.000343981	2.307	0.0106707	49.73	0.108156
LLNR	red soil	LT7s11	4.46	60	20	20	sandy clay loam	2	471.9	0.588698	69.49	0.142925	1.691	0.00273006	95.89	0.122621	9.408	0.00719376	80.28	0.0730615	0.8442	0.000664201	2.481	0.0114755	25.79	0.0560896
LLNR	red soil	LT7s14	4.01	60	23.75	16.25	sandy loam	8	435.4	0.543164	72.12	0.148334	1.718	0.00277365	100.8	0.1289	8.631	0.00659963	20.49	0.0186476	0.8072	0.00063509	2.568	0.0118779	37.24	0.0809917
LLNR	white soil	LT8s6	4.38	62.5	22.5	15	sandy loam	9	66.27	0.0826722	22.94	0.0471822	1.454	0.00234743	57.2	0.0731458	8.173	0.00624943	0.5597	0.000509374	0	0	3.7	0.0171138	27.32	0.0594171
LLNR	white soil	LT8s8	3.74	68.75	17.5	13.75	sandy loam	3	66.05	0.0823977	21.84	0.0449198	0	0	46.91	0.0599872	11.19	0.00855635	0	0	0	0	2.089	0.00966235	28.88	0.0628099
LLNR	white soil	LT8s17	4.14	70	15	15	sandy loam	6	71.9	0.0896956	19.92	0.0409708	0	0	35.95	0.0459719	7.723	0.00590534	0	0	0	0	2.438	0.0112766	26.82	0.0583297
LLNR	white soil	LT8s22	4.34	65	17.5	17.5	sandy loam	5	78.18	0.0975299	26.37	0.0542369	3.253	0.00525186	64.56	0.0825575	12.42	0.00949686	0	0	0	0	3.004	0.0138945	35.96	0.0782079
LLNR	white soil	LT8s29	4.17	57.5	25	17.5	sandy loam	6	75.8	0.0945609	26.37	0.0542369	0	0	67.11	0.0858184	6.72	0.0051384	0	0	0	0	3.396	0.0157077	31.52	0.0685515
LLNR	red soil	LT9s1	4.47	43.75	28.75	27.5	clay loam	22	65.64	0.0818862	40.66	0.0836281	4.389	0.00708589	73.87	0.0944629	12.54	0.00958862	0	0	0.9774	0.000769001	4.049	0.018728	27.16	0.0590692
LLNR	red soil	LT9s4	4.34	31	34.5	34.5	clay loam	6	94.19	0.117502	60.38	0.124188	4.937	0.00797062	129.4	0.165473	16.73	0.0127925	13.05	0.0118766	1.061	0.000834776	3.124	0.0144496	30.07	0.065398
LLNR	red soil	LT9s7	4.4	30	22.5	47.5	clay	27	128.2	0.15993	78.39	0.16123	2.242	0.00361963	154.2	0.197187	26.18	0.0200184	14.59	0.0132781	0.526	0.000413847	2.96	0.013691	34.69	0.0754458
LLNR	red soil	LT9s10	4.09	56.5	18.5	25	sandy clay loam	24	66.75	0.083271	61.49	0.126471	3.353	0.0054133	125.5	0.160486	15.9	0.0121578	10.65	0.00969239	0.9913	0.000779937	3.03	0.0140148	28.27	0.0614833
LLNR	red soil	LT9s13	4.11	55	20	25	sandy clay loam	31	68.66	0.0856537	54.79	0.11269	7.947	0.0128302	123.4	0.157801	11.2	0.008564	15.72	0.0143065	1.133	0.000891424	3.178	0.0146994	29	0.0630709
LLNR	red soil	LT9s15	4.05	35	21.25	43.75	clay	31	86.03	0.107323	64.26	0.132168	7.397	0.0119422	127.7	0.163299	14.89	0.0113855	12.35	0.0112395	1.695	0.0013336	3.57	0.0165125	25.68	0.0558504
LLNR	red soil	LT9s23	4.62	53.75	26.25	20	sandy clay loam	20	93.86	0.117091	44.08	0.0906623	2.161	0.00348886	112.2	0.143478	14.66	0.0112097	9.542	0.00868402	0.8886	0.000699135	2.786	0.0128862	30.9	0.0672031
LLNR	white soil	LT10s1	4.07	85	10	5	loamy sand	1	74.06	0.0923902	17.04	0.0350473	0	0	18.91	0.0241816	14.66	0.0112097	0.8405	0.000764925	0	0	3.918	0.0181221	24.11	0.0524358
LLNR	white soil	LT10s11	3.92	85	7.5	7.5	loamy sand	1	99.17	0.123715	23.62	0.0485808	5.096	0.00822732	41.5	0.0530691	9.626	0.00736045	0.8403	0.000764743	0	0	2.917	0.0134921	27.41	0.0596129
LLNR	white soil	LT10s14	4.42	82.5	12.5	5	loamy sand	4	71.03	0.0886103	18	0.0370218	5.558	0.0089732	23.93	0.030601	7.498	0.00573329	0	0	0	0	2.089	0.00966235	20.87	0.0453893
LLNR	white soil	LT10s20	4	88.75	11.25	0	sand	2	69.93	0.087238	18.68	0.0384204	1.529	0.00246852	31.89	0.0407801	7.722	0.00590457	1.121	0.0010202	0	0	2.089	0.00966235	20.34	0.0442366
LLNR	white soil	LT10s29	4.23	92.5	7.5	0	sand	2	81.41	0.101559	23.76	0.0488688	1.082	0.00174685	34.15	0.0436701	11.19	0.00855635	1.402	0.00127594	0	0	2.742	0.0126827	18.22	0.0396259
LLNR	white soil	LT11s26	4.92	93.75	6.25	0	sand	1	86.39	0.107772	20.19	0.0415261	4.205	0.00678883	22.43	0.0286829	0.7911	0.000604909	1.121	0.0010202	0	0	3.134	0.0144958	24.91	0.0541757
LLNR	white soil	LT11s10	4.21	89	11	1	sand	0	103.8	0.129491	31.03	0.0638215	5.462	0.00881821	47.87	0.0612148	8.601	0.00657669	3.816	0.00347288	0	0	3.1	0.0143386	24.04	0.0522836
LLNR	white soil	LT11s17	4.31	91.25	8.75	0	sand	1	69.07	0.0861652	16.07	0.0330522	2.409	0.00388925	35.5	0.0453964	1.462	0.00111791	1.121	0.0010202	0	0	3.091	0.0142969	21.1	0.0458895
LLNR	white soil	LT11s12	3.92	88.75	11.25	0	sand	4	116.7	0.145584	32.13	0.0660839	6.888	0.0111204	51.71	0.0661253	12.54	0.00958862	3.086	0.00280852	0	0	3.57	0.0165125	23.51	0.0511309
LLNR	white soil	LT11s6	4.05	92.5	7.5	0	sand	0	123.8	0.154441	27.87	0.0573221	5.999	0.00968518	61.1	0.078133	12.09	0.00924453	5.893	0.00536312	0	0	2.394	0.0110731	23.33	0.0507395
LLNR	white soil	LT11s3	4.36	88.75	11.25	0	sand	1	123.1	0.153568	58.89	0.121123	7.808	0.0126057	68.61	0.0877366	16.12	0.012326	7.857	0.00715053	0	0	3.309	0.0153053	27.36	0.0595041
LLNR	white soil	LT12s3	4.09	82.5	6.25	11.25	loamy sand	1	72.33	0.090232	25.28	0.0519951	0	0	46.16	0.0590281	10.97	0.00838813	0.8403	0.000764743	0	0	3.047	0.0140934	30.18	0.0656372
LLNR	white soil	LT12s18	4.33	62.5	10	27.5	sandy clay loam	20	101.1	0.126123	40.1	0.0824763	0.3191	0.000515176	90.46	0.115678	14.1	0.0107815	5.893	0.00536312	1.155	0.000908733	2.699	0.0124838	39.12	0.0850805
LLNR	white soil	LT12s21	3.94	67.5	13.75	18.75	sandy loam	24	85.74	0.106961	29.25	0.0601604	0	0	55.92	0.071509	10.74	0.00821226	1.963	0.00178649	0.045	3.54052e-05	2.83	0.0130897	30.22	0.0657242
LLNR	white soil	LT12s23	4.49	80	8.75	11.25	sandy loam	5	73.41	0.0915793	23.49	0.0483135	0	0	48.57	0.06211	11.08	0.00847224	0.5596	0.000509283	0	0	2.83	0.0130897	24.64	0.0535885
LLNR	white soil	LT12s26	4.14	85	6.25	8.75	loamy sand	1	79.89	0.0996632	24.86	0.0511312	0	0	43.83	0.0560486	12.31	0.00941275	1.682	0.00153076	0	0	3.134	0.0144958	27.24	0.0592431
LLNR	red soil	large morpho 1	4.07	29	22	49	clay	33	95.2	0.118762	71.49	0.147038	4.846	0.0078237	130.5	0.16688	17.84	0.0136412	14.1	0.0128322	1.152	0.000906373	3.234	0.0149584	31.04	0.0675076
LLNR	red soil	large morpho 2	4.25	37.5	31.25	31.25	clay loam	4	79.88	0.0996507	43.4	0.0892637	0.51	0.000823377	86.57	0.110703	8.511	0.00650788	4.66	0.00424099	0.248	0.000195122	2.612	0.0120814	33.45	0.072749
LLNR	red soil	large morpho 3	4.34	45	22.5	32.5	sandy clay loam	14	373.4	0.465818	132.7	0.272933	8.901	0.0143704	131.2	0.167775	23.34	0.0178468	59.05	0.0537404	1.282	0.00100865	3.729	0.0172479	41.56	0.0903871
LLNR	red soil	large morpho 4	4.16	40	27.5	32.5	clay loam	23	75.39	0.0940494	47.84	0.0983957	2.368	0.00382305	100.48	0.128491	12.18	0.00931335	13.63	0.0124044	0.3484	0.000274115	2.341	0.0108279	22.4	0.0487168
LLNR	red soil	large morpho 5	3.98	38.75	18.75	42.5	clay	10	94.27	0.117602	50.84	0.104566	3.732	0.00602519	118.2	0.151151	12.95	0.00990213	10.25	0.00932836	1.635	0.00128639	1.921	0.00888529	35.8	0.0778599
LLNR	red soil	large morpho 6	4.13	42.5	35	22.5	loam	15	98.96	0.123453	63.94	0.13151	6.992	0.0112883	107.7	0.137724	14.33	0.0109573	19.75	0.0179742	1.417	0.00111487	3.217	0.0148797	41.91	0.0911483
LLNR	red soil	large morpho 7	3.9	40	30	30	clay loam	22	100.2	0.125	81.49	0.167606	4.851	0.00783177	132.8	0.169821	13.86	0.010598	24.1	0.021933	1.05	0.000826121	2.374	0.0109806	32.34	0.0703349
LLNR	red soil	large morpho 8	4.1	51.25	22.5	26.25	sandy clay loam	12	207	0.258234	68.5	0.140889	2.215	0.00357604	101.9	0.130307	16.69	0.0127619	15.62	0.0142155	1.105	0.000869394	1.96	0.00906568	50.34	0.109482
LLNR	red soil	large morpho 9	4.43	60.5	15	24.5	sandy clay loam	20	108.17	0.134943	52.1	0.107158	0.1922	0.0003103	97.26	0.124373	10.501	0.00802952	14.04	0.0127776	0.2096	0.00016491	2.612	0.0120814	31.23	0.0679208
ACTS	floodplain	AT1s1	4.02	46.25	21.25	32.5	sandy clay loam	3	89.2	0.111277	25.54	0.0525298	0	0	48.49	0.0620077	9.066	0.00693225	1.683	0.00153167	0.4446	0.000349803	1.785	0.00825624	31.54	0.068595
ACTS	floodplain	AT1s2	3.92	42.5	16.25	41.25	clay	0	89.64	0.111826	25.54	0.0525298	0	0	53.22	0.0680563	10.85	0.00829638	1.121	0.0010202	0.1856	0.000146027	1.349	0.00623959	28.58	0.0621575
ACTS	floodplain	AT1s3	3.92	28.75	13.75	57.5	clay	3	206.6	0.257735	80.56	0.165693	0.7901	0.00127559	91.57	0.117097	14.89	0.0113855	13.75	0.0125137	1.155	0.000908733	1.219	0.0056383	33.41	0.072662
ACTS	floodplain	AT1s4	3.99	22.5	15	62.5	clay	2	119.8	0.149451	60.4	0.124229	2.205	0.0035599	105.1	0.134399	11.42	0.00873222	12.35	0.0112395	0.7406	0.000582691	1.175	0.00543478	37.53	0.0816224
ACTS	floodplain	AT1s7	4.11	50	20	30	sandy clay loam	1	85.01	0.10605	31.03	0.0638215	0	0	37.45	0.04789	7.276	0.00556354	7.297	0.00664088	0.8146	0.000640913	1.393	0.00644311	28	0.060896
ACTS	floodplain	AT1s8	3.84	35	15	50	clay	2	135.1	0.168538	58.75	0.120835	0.8139	0.00131401	81.52	0.104246	13.65	0.0104374	18.52	0.0168548	0.9848	0.000774823	1.088	0.00503238	30.6	0.0665507
ACTS	floodplain	AT1s9	3.96	22.5	10	67.5	clay	6	143	0.178393	76.46	0.15726	2.948	0.00475944	104	0.132992	17.46	0.0133507	11.23	0.0102202	1.636	0.00128718	0	0	35.22	0.0765985
ACTS	floodplain	AT1s10	3.72	16.25	16.25	67.5	clay	0	131.7	0.164296	69.19	0.142308	0	0	105.7	0.135166	15.67	0.011982	13.47	0.0122588	2.761	0.00217231	0.8268	0.00382424	40.19	0.0874076
ACTS	floodplain	AT1s13	3.83	17.5	22.5	60	clay	1	154.5	0.19274	53.53	0.110099	1.561	0.00252018	96.08	0.122864	11.75	0.00898455	8.138	0.00740626	1.777	0.00139811	0	0	29.92	0.0650718
ACTS	floodplain	AT2s1	4.15	25	22.5	52.5	clay	1	117.1	0.146083	69.73	0.143418	2.618	0.00422667	91.13	0.116535	8.288	0.00633736	33.96	0.0309064	0.9256	0.000728245	2.002	0.00925994	33.81	0.073532
ACTS	floodplain	AT2s4	4.41	37.5	31.25	31.25	clay loam	11	111.9	0.139596	54.63	0.112361	1.297	0.00209396	59.67	0.0763043	9.624	0.00735892	70.74	0.0643793	0.7184	0.000565224	2.002	0.00925994	31.41	0.0683123
ACTS	floodplain	AT3s1	3.95	21.25	20	58.75	clay	0	144.1	0.179765	75.61	0.155512	0	0	78.44	0.100307	5.823	0.00445252	105.3	0.0958318	0.9404	0.00073989	1.915	0.00885754	40.06	0.0871248
ACTS	floodplain	AT3s3	4.35	18.75	15	66.25	clay	0	254.2	0.317116	79.44	0.16339	0	0	68.96	0.0881841	7.172	0.00548402	35.65	0.0324445	1.384	0.00108891	2.264	0.0104718	39.73	0.0864071
ACTS	floodplain	AT3s5	3.98	23.75	26.25	50	clay	2	228.8	0.285429	70.25	0.144488	0	0	68.66	0.0878005	7.282	0.00556813	41.54	0.0378049	0.933	0.000734068	2.133	0.00986586	41.36	0.0899522
ACTS	floodplain	AT3s7	3.99	25	25	50	clay	0	107.8	0.134481	71.52	0.1471	1.948	0.00314498	68.53	0.0876343	8.735	0.00667916	18.8	0.0171096	2.161	0.00170024	1.698	0.00785384	39.65	0.0862331
ACTS	floodplain	AT4s2	4.21	15	25	60	clay	0	95.37	0.118975	37.9	0.0779515	0	0	71.91	0.0919565	8.732	0.00667686	10.1	0.00919185	1.399	0.00110071	1.785	0.00825624	31.45	0.0683993
ACTS	floodplain	AT4s4	4.16	23.75	31.25	45	clay	0	106.9	0.133358	51.34	0.105594	1.702	0.00274782	69.88	0.0893606	7.167	0.0054802	20.21	0.0183928	1.007	0.00079229	1.785	0.00825624	28.89	0.0628317
ACTS	floodplain	AT4s6	4.17	20	21.25	58.75	clay	1	146.3	0.18251	106.8	0.219663	0	0	76.86	0.0982864	7.841	0.00599557	71.86	0.0653986	1.569	0.00123446	1.915	0.00885754	33.8	0.0735102
ACTS	floodplain	AT4s7	4.23	21.25	28.75	50	clay	3	120.9	0.150823	70.96	0.145948	0	0	68.9	0.0881074	6.273	0.0047966	45.47	0.0413815	1.658	0.00130448	1.915	0.00885754	35.27	0.0767073
ACTS	floodplain	AT5s1	4.14	66.25	13.75	20	sandy clay loam	7	83.46	0.104117	25.54	0.0525298	1.467	0.00236842	42.25	0.0540281	8.282	0.00633277	9.823	0.00893975	0	0	2.133	0.00986586	22.13	0.0481296
ACTS	floodplain	AT5s2	4.15	62.5	16.25	21.25	sandy clay loam	7	80.28	0.10015	23.62	0.0485808	1.001	0.00161608	41.35	0.0528772	9.177	0.00701713	4.77	0.0043411	0	0	2.22	0.0102683	25.34	0.0551109
ACTS	floodplain	AT5s3	4.4	62.5	17.5	20	sandy clay loam	6	123.8	0.154441	48.04	0.0988071	6.838	0.0110397	72.89	0.0932097	9.851	0.0075325	20.49	0.0186476	0	0	1.915	0.00885754	28.8	0.0626359
ACTS	floodplain	AT5s5	4.35	27.5	22.5	50	clay	0	510	0.636228	182	0.374332	3.449	0.00556829	101.3	0.12954	7.389	0.00564995	323.1	0.294048	1.096	0.000862313	2.22	0.0102683	33.11	0.0720096
ACTS	floodplain	AT5s8	4.51	32.5	30	37.5	clay loam	0	403.1	0.502869	110.9	0.228095	1.576	0.0025444	60	0.0767263	5.817	0.00444793	270.9	0.246542	1.414	0.00111251	2.176	0.0100648	25.73	0.0559591
ACTS	floodplain	AT5s10	4.45	22.5	31.25	46.25	clay	0	223.4	0.278693	69.55	0.143048	2.085	0.00336616	60.93	0.0779156	6.269	0.00479355	116.2	0.105752	1.229	0.000966955	2.22	0.0102683	25.63	0.0557416
ACTS	floodplain	AT5s11	4.36	25	25	50	clay	0	561	0.69985	147.8	0.30399	2.615	0.00422183	84.91	0.108581	4.606	0.00352195	104.1	0.0947397	0.933	0.000734068	1.915	0.00885754	28.4	0.061766
ACTS	floodplain	AT5s12	4.43	20	27.5	52.5	clay	0	342.6	0.427395	79.81	0.164151	1.647	0.00265902	63.02	0.0805882	5.6	0.004282	113.7	0.103477	1.177	0.000926042	1.567	0.00724792	24.32	0.0528926
ACTS	floodplain	AT5s13	4.37	18.75	28.75	52.5	clay	0	631.1	0.7873	129.8	0.266968	3.401	0.0054908	70.71	0.090422	6.617	0.00505964	107.5	0.097834	1.421	0.00111802	2.176	0.0100648	27.95	0.0607873
ACTS	floodplain	AT6s1	4.25	25	28.75	46.25	clay	3	507.6	0.633234	114	0.234471	5.418	0.00874717	87.1	0.111381	9.412	0.00719682	93.47	0.0850655	2.628	0.00206766	1.741	0.00805273	33.53	0.072923
ACTS	floodplain	AT6s2	4.21	30	33.75	36.25	clay loam	1	535.3	0.667789	142.1	0.292267	0.6156	0.000993865	81.83	0.104642	11.53	0.00881633	174.3	0.158628	1.969	0.00154917	0	0	25.54	0.0555459
ACTS	floodplain	AT6s4	4.54	22.5	25	52.5	clay	0	807.7	1.00761	234.7	0.482723	6.613	0.0106765	146.1	0.186829	6.405	0.00489754	116.8	0.106298	1.31	0.00103068	0	0	27.35	0.0594824
ACTS	floodplain	AT6s5	4.28	17.5	23.75	58.75	clay	0	185.4	0.231287	100.5	0.206705	0.7535	0.0012165	77.08	0.0985678	5.156	0.0039425	48.84	0.0444485	1.421	0.00111802	0	0	26.62	0.0578947
ACTS	floodplain	AT6s8	4.3	18.75	35	46.25	clay	1	118.8	0.148204	65.61	0.134944	0.6732	0.00108686	85.5	0.109335	13.32	0.010185	53.05	0.0482799	1.703	0.00133989	1.654	0.00765032	28.94	0.0629404
ACTS	floodplain	AT7s1	3.99	15.5	20	64.5	clay	0	277.9	0.346682	112.73	0.231859	2.9234	0.00471973	78.78	0.100742	6.278	0.00480043	54.09	0.0492264	1.1662	0.000917545	1.534	0.00709528	26.66	0.0579817
ACTS	floodplain	AT7s2	4.66	16.25	23.75	60	clay	2	321.4	0.400948	136.3	0.280337	4.562	0.00736519	85.54	0.109386	6.282	0.00480349	30.59	0.0278395	0.2966	0.00023336	1.48	0.00684551	26.52	0.0576773
ACTS	floodplain	AT7s4	4.68	20	27.5	52.5	clay	7	414.5	0.517091	153.4	0.315508	4.333	0.00699548	80.05	0.102366	4.607	0.00352271	42.66	0.0388242	1.518	0.00119434	1.48	0.00684551	27.14	0.0590257
ACTS	floodplain	AT7s5	4.7	15	37.5	47.5	clay	4	219.6	0.273952	88.92	0.182888	2.375	0.00383436	78.73	0.100678	5.942	0.00454351	30.31	0.0275846	2.265	0.00178206	1.654	0.00765032	27.99	0.0608743
ACTS	floodplain	AT7s6	4.25	25	31.25	43.75	clay	5	156.1	0.194736	72.31	0.148725	0.4237	0.000684049	70.78	0.0905115	8.28	0.00633124	112.8	0.102657	0.5852	0.000460425	1.523	0.0070444	24.97	0.0543062
ACTS	floodplain	AT8s1	4.06	25	23.75	51.25	clay	5	210	0.261976	57.61	0.11849	0	0	76.63	0.0979923	12.19	0.009321	134.2	0.122133	1.177	0.000926042	2.176	0.0100648	35.03	0.0761853
ACTS	floodplain	AT8s4	4.03	25	32.5	42.5	clay	2	159	0.198353	95.77	0.196977	0	0	83.17	0.106355	12.08	0.00923689	173.2	0.157627	0.896	0.000704957	1.785	0.00825624	33	0.0717703
ACTS	floodplain	AT8s5	4.16	20	27.5	52.5	clay	1	229.2	0.285928	80.11	0.164768	0	0	80.9	0.103453	7.835	0.00599098	138.7	0.126229	1.103	0.000867821	2.176	0.0100648	30.66	0.0666812
ACTS	floodplain	AT8s6	4.17	25	45	30	clay loam	3	163.9	0.204466	42.08	0.0865487	0.8895	0.00143607	47.27	0.0604476	6.926	0.00529592	258.8	0.23553	0.1782	0.000140205	2.22	0.0102683	25.27	0.0549587
ACTS	terra firme	AT9s2	4.01	40	25	35	clay loam	8	103.4	0.128992	73.02	0.150185	0.0596	9.62222e-05	73.03	0.0933887	10.97	0.00838813	55.58	0.0505825	0.2744	0.000215893	0.0431	0.000199352	27.59	0.0600043
ACTS	terra firme	AT9s4	4.11	42.5	26.25	31.25	clay loam	0	93.88	0.117116	48.03	0.0987865	0	0	69.96	0.0894629	15.32	0.0117143	137.8	0.12541	0.7924	0.000623446	2.002	0.00925994	31.63	0.0687908
ACTS	terra firme	AT9s7	4.04	38.75	30	31.25	clay loam	10	100.4	0.12525	66.41	0.13659	2.593	0.00418631	64.55	0.0825448	13.42	0.0102615	182.2	0.165817	0.9108	0.000716601	0.0431	0.000199352	26.33	0.057264
ACTS	terra firme	AT9s11	3.85	45	16.25	38.75	clay loam	6	81.67	0.101884	38.17	0.0785068	0	0	56.22	0.0718926	9.175	0.0070156	13.75	0.0125137	0	0	0	0	22.99	0.05
ACTS	terra firme	AT9s12	4.05	47.5	17.5	35	sandy clay loam	5	107.8	0.134481	45.44	0.0934595	0.5752	0.000928641	44.05	0.0563299	12.31	0.00941275	17.12	0.0155806	0	0	2.046	0.00946346	23.69	0.0515224
ACTS	terra firme	AT9s15	4.52	42.5	20	37.5	clay loam	13	98.76	0.123204	65.34	0.134389	0	0	67.7	0.0865729	7.947	0.00607662	31.44	0.028613	0.1708	0.000134382	0.0866	0.000400555	19.09	0.0415181
ACTS	terra firme	AT10s2	4.7	32.5	22.5	45	clay	1	181.8	0.226796	55.83	0.114829	1.704	0.00275105	72.95	0.0932864	7.833	0.00598945	118.5	0.107845	0.8368	0.000658379	1.915	0.00885754	26.67	0.0580035
ACTS	terra firme	AT10s6	4.22	52.5	10	37.5	sandy clay	3	85.43	0.106574	30.34	0.0624023	2.375	0.00383436	45.86	0.0586445	4.928	0.00376816	8.419	0.00766199	0	0	1.828	0.00845513	20.51	0.0446064
ACTS	terra firme	AT10s7	4.26	47.5	15	37.5	sandy clay	1	99.52	0.124152	31.85	0.065508	2.341	0.00377946	35.87	0.0458696	5.711	0.00436688	23.3	0.021205	0	0	2.786	0.0128862	22.42	0.0487603
ACTS	terra firme	AT10s9	4.43	45	17.5	37.5	sandy clay	0	82.44	0.102844	39.4	0.0810366	1.903	0.00307233	34.52	0.0441432	3.024	0.00231228	53.89	0.0490444	0	0	2.438	0.0112766	20.19	0.0439104
ACTS	terra firme	AT10s11	4.62	42.5	21.25	36.25	clay loam	5	219.8	0.274202	116.7	0.240025	4.007	0.00646916	91.57	0.117097	7.485	0.00572335	374.2	0.340553	0.3484	0.000274115	1.828	0.00845513	23.82	0.0518051
ACTS	terra firme	AT10s12	4.84	50	20	30	sandy clay loam	3	144.3	0.180015	85.76	0.176388	0	0	47.42	0.0606394	7.384	0.00564612	153	0.139243	1.873	0.00147364	2.22	0.0102683	27.3	0.0593736
ACTS	terra firme	AT11s3	4.29	60	10	30	sandy clay loam	9	158	0.197106	45.7	0.0939942	0.102	0.000164675	57.64	0.0737084	3.589	0.0027443	20.21	0.0183928	0	0	2.699	0.0124838	21.32	0.046368
ACTS	terra firme	AT11s4	4.02	50	16.25	33.75	sandy clay loam	5	131.5	0.164047	45.15	0.092863	0.0324	5.23087e-05	71.38	0.0912788	5.263	0.00402432	62.31	0.0567073	0.2448	0.000192604	2.394	0.0110731	25.04	0.0544585
ACTS	terra firme	AT11s5	4	42.5	57.5	0	silt loam	9	85.48	0.106637	33.91	0.069745	0	0	52.24	0.0668031	5.486	0.00419483	21.05	0.0191573	0.082	6.45161e-05	1.436	0.006642	26.03	0.0566116
ACTS	terra firme	AT11s7	3.85	60	5	35	sandy clay loam	8	115.1	0.143588	33.08	0.0680378	0	0	43.08	0.0550895	6.271	0.00479508	11.23	0.0102202	0	0	1.959	0.00906105	31.56	0.0686385
ACTS	terra firme	AT11s9	3.91	45	7.5	47.5	sandy clay	9	101.5	0.126622	24.99	0.0513986	0	0	23.33	0.0298338	4.704	0.00359688	3.367	0.00306425	0	0	2.176	0.0100648	27.78	0.0604176
ACTS	terra firme	AT11s10	4.11	55	7.5	37.5	sandy clay	9	111.9	0.139596	33.22	0.0683258	2.402	0.00387795	70.79	0.0905243	8.509	0.00650635	2.805	0.00255278	0	0	2.002	0.00925994	30.57	0.0664854
ACTS	terra firme	AT12s1	4.22	52.5	17.5	30	sandy clay loam	1	126.4	0.157685	39.1	0.0804196	0	0	47.81	0.0611381	6.266	0.00479125	104.4	0.0950127	1.31	0.00103068	2.655	0.0122803	31.13	0.0677033
ACTS	terra firme	AT12s3	4.4	25	27.5	47.5	clay	0	218.3	0.27233	42.65	0.0877211	3.573	0.00576849	42.23	0.0540026	6.938	0.00530509	94.6	0.0860939	0.4224	0.000332337	2.002	0.00925994	32.97	0.0717051
ACTS	terra firme	AT12s7	4.26	40	17.5	42.5	clay	9	119.4	0.148952	47.62	0.0979432	0.977	0.00157733	46	0.0588235	8.729	0.00667457	57.82	0.052621	0.0376	2.9583e-05	2.002	0.00925994	27.85	0.0605698
ACTS	terra firme	AT12s8	4.19	50	17.5	32.5	sandy clay loam	2	115.6	0.144212	47.35	0.0973879	0	0	45.85	0.0586317	5.039	0.00385304	55.3	0.0503276	0.415	0.000326515	2.481	0.0114755	28.54	0.0620705
ACTS	terra firme	AT12s10	3.86	45	13.75	41.25	sandy clay	5	94.5	0.117889	35.83	0.073694	0.0505	8.15305e-05	49.16	0.0628645	6.495	0.00496636	10.38	0.00944667	0.2226	0.000175138	2.264	0.0104718	26.25	0.05709
ACTS	terra firme	AT12s11	4.07	40	17.5	42.5	clay	2	116.4	0.14521	39.13	0.0804813	2.31	0.00372942	73.56	0.0940665	10.52	0.00804404	11.79	0.0107299	0.1042	8.19827e-05	2.394	0.0110731	34.11	0.0741844
ACTS	terra firme	AT12s13	4.05	37.5	12.5	50	clay	9	87.39	0.109019	56.01	0.1152	2.352	0.00379722	77.1	0.0985934	11.31	0.00864811	40.7	0.0370404	0	0	3.134	0.0144958	33.82	0.0735537
ACTS	terra firme	AT12s14	4.45	55	11.25	33.75	sandy clay loam	0	121.4	0.151447	31.98	0.0657754	2.809	0.00453503	35.04	0.0448082	12.53	0.00958098	25.54	0.0232435	0	0	2.046	0.00946346	29.33	0.0637886
ACTS	terra firme	AT13s1	4.27	47.5	12.5	40	sandy clay	3	645.7	0.805514	71.91	0.147902	1.439	0.00232322	43.75	0.0559463	8.401	0.00642377	102.2	0.0930106	0	0	2.176	0.0100648	32.3	0.0702479
ACTS	terra firme	AT13s5	4.95	41.25	21.25	37.5	clay loam	18	1696	2.11577	243.5	0.500823	0.9893	0.00159719	61.17	0.0782225	13.02	0.00995565	64.55	0.0587459	0	0	2.568	0.0118779	36.29	0.0789256
ACTS	terra firme	AT13s7	4	43.75	12.5	43.75	clay	1	342.5	0.42727	40.71	0.083731	2.756	0.00444947	52.58	0.0672379	7.056	0.00539532	23.02	0.0209501	0.0376	2.9583e-05	1.436	0.006642	28.85	0.0627447
ACTS	terra firme	AT13s8	3.95	50	10	40	sandy clay	4	171.8	0.214321	41.44	0.0852324	0.983	0.00158702	56.36	0.0720716	5.488	0.00419636	29.75	0.027075	0	0	1.828	0.00845513	28	0.060896
ACTS	terra firme	AT13s9	3.81	47.5	7.5	45	sandy clay	7	117.6	0.146707	34.31	0.0705677	0.1299	0.000209719	39.39	0.0503708	6.379	0.00487766	16.28	0.0148162	0	0	0.0866	0.000400555	24.45	0.0531753
ACTS	terra firme	AT13s10	4.02	43.75	11.25	45	clay	13	140.6	0.175399	35	0.0719868	1.036	0.00167259	46.75	0.0597826	6.495	0.00496636	15.16	0.0137969	0	0	1.959	0.00906105	28.55	0.0620922
ACTS	terra firme	AT13s12	4.49	45	12.5	42.5	sandy clay	7	795.4	0.992265	63.63	0.130872	1.443	0.00232967	41.4	0.0529412	5.271	0.00403043	110	0.100109	0	0	2.22	0.0102683	32.37	0.0704002
ACTS	floodplain	AT14s2	4.29	42.5	25	32.5	clay loam	1	404.4	0.504491	95.96	0.197367	2.068	0.00333871	60.15	0.0769182	5.704	0.00436152	280.1	0.254914	1.103	0.000867821	2.438	0.0112766	30.79	0.0669639
ACTS	floodplain	AT14s4	4.29	22.5	37.5	40	clay	0	916.4	1.14321	184.8	0.38009	10.84	0.0175008	87.41	0.111777	13.66	0.010445	258.2	0.234984	2.25	0.00177026	1.61	0.00744681	37.94	0.0825141
ACTS	floodplain	AT14s5	5	28.75	31.25	40	clay	2	273.7	0.341442	91.17	0.187515	1.156	0.00186632	72.19	0.0923146	6.255	0.00478284	355.1	0.323171	1.125	0.00088513	2.002	0.00925994	33.44	0.0727273
