# Supplementary material for: Edaphic and light conditions of sympatric plant morphotypes in western Amazonia
Source: Biodivers Data J. 2014 May 10;(2):e1078. doi: 10.3897/BDJ.2.e1078 (PMC4040399; doi:10.3897/BDJ.2.e1078)
Supplement: Supplementary material 4 — Light conditions associated with the occurrence of Geonoma macrostachys at three Peruvian forests [file biodiversity_data_journal-2-e1078-s004.xls]

## Sheet: light all
Location	Habitat	Plot	Morphotype	% canopy openness	Leaf area index (4Ring)	Leaf area index (5Ring)	Transmitted Direct	Transmitted Diffuse	Transmitted Total	% Transmitted Direct	% Transmitted Diffuse	% Transmitted Total
EBCC	terra firme	CT9s8	macrostachys	8.36	2.66	2.66	4.89	2.94	7.82	18.21	13.37	16.03
EBCC	terra firme	CT9s4	macrostachys	5.5	3.44	3.45	4.48	2.2	6.68	16.7	10.02	13.69
EBCC	terra firme	CT9s15	macrostachys	8.29	2.71	2.78	3.67	2.85	6.51	13.66	12.96	13.34
EBCC	terra firme	CT9s13	macrostachys	5.87	3.27	3.12	3.59	1.87	5.46	13.39	8.51	11.2
EBCC	terra firme	CT8s8	macrostachys	6.92	2.99	3.05	3.76	2.59	6.35	14.03	11.78	13.02
EBCC	terra firme	CT8s3	macrostachys	8.87	2.62	2.56	4.56	3.08	7.64	17	14.03	15.66
EBCC	terra firme	CT8s2	macrostachys	6.41	3.11	3.07	3.01	2.3	5.31	11.22	10.49	10.89
EBCC	terra firme	CT8s12	macrostachys	6.87	2.93	2.87	2.19	2.3	4.49	8.17	10.46	9.2
EBCC	terra firme	CT7s8	macrostachys	7.78	2.98	2.64	3.29	2.22	5.51	12.28	10.1	11.3
EBCC	terra firme	CT7s6	macrostachys	9.08	2.58	2.69	4.49	3.26	7.75	16.71	14.86	15.88
EBCC	terra firme	CT7s4	macrostachys	6.69	2.97	2.85	2.85	2.21	5.06	10.62	10.05	10.36
EBCC	terra firme	CT7s3	macrostachys	6.85	3.13	2.93	3.03	2.04	5.07	11.28	9.29	10.39
EBCC	terra firme	CT7s13	macrostachys	7.54	2.87	2.82	2.7	2.77	5.47	10.08	12.61	11.22
EBCC	terra firme	CT6s7	macrostachys	8.24	2.85	2.67	2.37	2.83	5.19	8.82	12.88	10.64
EBCC	terra firme	CT6s13	macrostachys	6.2	3.1	3.07	3.28	2.26	5.54	12.23	10.28	11.35
EBCC	terra firme	CT6s11	macrostachys	7.69	2.8	2.71	3.77	2.49	6.26	14.06	11.32	12.83
EBCC	terra firme	CT6s10	macrostachys	6.36	3.18	2.84	2.61	1.98	4.59	9.74	9	9.41
EBCC	terra firme	CT6s1	macrostachys	8.38	2.74	2.81	5.31	3.13	8.44	19.78	14.24	17.29
EBCC	floodplain	CT5s2	acaulis	4.39	4.18	4.17	2.08	1.92	3.99	7.74	8.73	8.18
EBCC	floodplain	CT4s5	acaulis	6.36	3.03	3.11	3.35	2.21	5.56	12.48	10.05	11.39
EBCC	floodplain	CT4s4	acaulis	5.24	3.68	3.2	2.26	2.01	4.27	8.43	9.14	8.75
EBCC	floodplain	CT4s2	acaulis	5.43	3.3	3.06	2.68	1.81	4.49	9.98	8.26	9.21
EBCC	floodplain	CT4s2	macrostachys	6.21	3.1	2.99	3.34	2.23	5.56	12.43	10.15	11.4
EBCC	floodplain	CT4s11	acaulis	4.73	3.49	3.22	2.46	1.63	4.09	9.18	7.43	8.39
EBCC	floodplain	CT3s9	acaulis	9.48	2.59	2.81	5.28	3.57	8.85	19.68	16.24	18.13
EBCC	floodplain	CT3s5	acaulis	6.22	3.29	3.41	3.86	2.56	6.42	14.39	11.65	13.16
EBCC	floodplain	CT3s4	acaulis	6.26	3.08	3.62	3.72	2.46	6.18	13.85	11.22	12.67
EBCC	floodplain	CT3s3	acaulis	7.23	3.27	2.82	4.05	2.72	6.77	15.08	12.39	13.87
EBCC	floodplain	CT3s2	acaulis	9.09	2.55	2.5	3.87	3.04	6.91	14.44	13.82	14.16
EBCC	floodplain	CT3s15	acaulis	8.94	2.63	2.67	4.49	3.29	7.78	16.75	14.98	15.95
EBCC	floodplain	CT3s13	acaulis	4.75	4.12	3.99	3.77	2.04	5.81	14.06	9.29	11.91
EBCC	floodplain	CT3s11	acaulis	8.45	2.71	2.75	4.67	3.12	7.8	17.42	14.22	15.98
EBCC	floodplain	CT2s9	acaulis	6.71	3.8	3.58	4.97	2.93	7.9	18.52	13.36	16.2
EBCC	floodplain	CT2s8	macrostachys	5.91	3.28	3.07	3.17	2	5.17	11.83	9.09	10.6
EBCC	floodplain	CT2s4	macrostachys	6.57	3.16	2.94	3.69	2.4	6.09	13.75	10.92	12.48
EBCC	floodplain	CT2s2	macrostachys	3.58	3.85	3.72	1.57	1.12	2.69	5.84	5.11	5.51
EBCC	floodplain	CT2s15	acaulis	7.41	2.74	2.81	3.28	2.41	5.69	12.21	10.99	11.66
EBCC	floodplain	CT2s14	macrostachys	6.05	3.03	3.1	2.14	2.15	4.29	7.97	9.78	8.78
EBCC	floodplain	CT2s12	macrostachys	6.73	2.94	3.09	3.61	2.44	6.04	13.44	11.09	12.38
EBCC	floodplain	CT1s8	acaulis	5.71	3.34	3.09	3.39	2.08	5.47	12.64	9.48	11.22
EBCC	floodplain	CT1s8	macrostachys	5.43	3.28	3.12	2.66	1.81	4.47	9.9	8.26	9.16
EBCC	floodplain	CT1s6	acaulis	6.29	2.97	3.1	2.74	2.01	4.75	10.19	9.17	9.74
EBCC	floodplain	CT1s3	acaulis	6.14	3.1	2.99	3.54	2.17	5.71	13.2	9.87	11.7
EBCC	floodplain	CT1s2	acaulis	4.47	3.56	3.57	2.25	1.74	3.98	8.37	7.9	8.16
EBCC	floodplain	CT18s9	acaulis	5.82	3.48	3.31	3.3	2.39	5.69	12.3	10.88	11.66
EBCC	floodplain	CT18s8	macrostachys	7.74	2.83	2.83	3.82	2.88	6.69	14.22	13.1	13.72
EBCC	floodplain	CT18s8	acaulis	5.83	3.37	3	3.61	2.05	5.65	13.45	9.32	11.59
EBCC	floodplain	CT18s6	macrostachys	4.5	3.62	3.47	2.82	1.71	4.53	10.52	7.77	9.28
EBCC	floodplain	CT18s2	acaulis	7.42	3.14	3.08	4.85	2.98	7.83	18.08	13.58	16.05
EBCC	floodplain	CT18s2	macrostachys	8.26	3.21	2.84	4.79	3.36	8.14	17.84	15.28	16.69
EBCC	floodplain	CT18s15	macrostachys	7	2.8	2.93	2.54	2.31	4.84	9.46	10.5	9.93
EBCC	floodplain	CT18s14	macrostachys	6.47	3.06	3.1	3.51	2.27	5.78	13.09	10.32	11.84
EBCC	floodplain	CT17s9	acaulis	6.5	3.01	2.94	3.04	2.16	5.2	11.33	9.84	10.66
EBCC	floodplain	CT17s8	macrostachys	5.9	3.28	3.05	3.09	2.03	5.12	11.51	9.24	10.49
EBCC	floodplain	CT17s6	acaulis	7.11	3.07	2.73	2.74	2.02	4.75	10.2	9.19	9.74
EBCC	floodplain	CT17s6	macrostachys	6.87	2.95	2.79	3.16	2.26	5.42	11.78	10.29	11.11
EBCC	floodplain	CT17s2	macrostachys	5.96	3.06	3.21	3.48	2.1	5.59	12.98	9.58	11.45
EBCC	floodplain	CT17s15	acaulis	6.71	3.14	3.32	4.06	2.56	6.62	15.13	11.67	13.57
EBCC	floodplain	CT17s13	macrostachys	5.51	3.31	3.19	3.11	1.99	5.11	11.6	9.07	10.46
EBCC	floodplain	CT17s12	macrostachys	5.79	3.09	3.02	2.21	1.76	3.97	8.23	8.01	8.13
EBCC	terra firme	CT16s9	macrostachys	5.91	3.35	2.94	3.01	1.93	4.94	11.21	8.78	10.12
EBCC	terra firme	CT16s4	macrostachys	6.59	2.91	3.03	3.14	2.23	5.38	11.7	10.18	11.02
EBCC	terra firme	CT16s11	macrostachys	7.52	3.21	3.36	5.27	2.9	8.17	19.63	13.2	16.74
EBCC	terra firme	CT16s10	macrostachys	6.36	3.2	3.02	3.72	2.4	6.12	13.85	10.92	12.53
EBCC	floodplain	CT15s6	acaulis	6.1	3.18	2.96	3.22	2.1	5.32	12	9.57	10.91
EBCC	floodplain	CT15s11	acaulis	5.73	3.36	3.07	2.12	1.99	4.11	7.91	9.04	8.42
EBCC	floodplain	cadle~50	acaulis	7.95	2.95	2.72	4.43	2.93	7.36	16.51	13.33	15.08
EBCC	floodplain	9~975	acaulis	7.51	2.69	3	2.51	2.52	5.02	9.34	11.46	10.3
EBCC	floodplain	9~876	acaulis	6.5	3.13	2.86	2.6	2.07	4.68	9.69	9.45	9.58
EBCC	floodplain	9~585	acaulis	6.5	3.01	3.14	3.92	2.16	6.08	14.62	9.82	12.46
EBCC	floodplain	8~075	acaulis	6.41	3.24	3.05	2.4	2.41	4.81	8.94	10.98	9.86
EBCC	floodplain	6~1500	acaulis	6	3.09	2.96	2.12	1.76	3.89	7.91	8.03	7.97
EBCC	floodplain	6~1440	acaulis	6.37	3.14	3.05	3.4	2.23	5.63	12.68	10.16	11.55
EBCC	floodplain	59~1035	acaulis	6.24	3.01	2.95	2.34	1.94	4.28	8.71	8.84	8.77
EBCC	floodplain	52~250b	acaulis	6.56	3.24	3.54	4.04	2.7	6.74	15.05	12.29	13.81
EBCC	floodplain	52~250a	acaulis	7.61	2.67	2.92	3.42	2.64	6.06	12.74	12.04	12.43
EBCC	floodplain	5~945	acaulis	8.76	2.7	2.96	3.51	3.04	6.55	13.09	13.85	13.43
EBCC	floodplain	5~450	acaulis	7.49	2.84	2.9	4.34	2.71	7.05	16.16	12.34	14.44
EBCC	floodplain	5~1648	acaulis	7.06	3.19	3.04	3.64	2.8	6.44	13.56	12.75	13.19
EBCC	floodplain	28~600	acaulis	7.25	3.03	3.25	4.74	2.92	7.66	17.66	13.31	15.7
EBCC	floodplain	11~1800	acaulis	6.78	3.69	2.92	2.78	2.46	5.24	10.36	11.19	10.74
EBCC	floodplain	11~1150	acaulis	6	3.08	3.17	2.57	2.15	4.72	9.58	9.78	9.67
EBCC	floodplain	10~950	acaulis	8.73	2.69	2.48	3.34	2.7	6.04	12.46	12.3	12.39
EBCC	floodplain	control		5.55	3.27	3.47	3.55	2.15	5.7	13.23	9.77	11.67
EBCC	floodplain	control		5.28	3.29	3.19	2.02	1.68	3.7	7.54	7.63	7.58
EBCC	floodplain	control		6.5	3.24	3.23	3.22	2.55	5.77	12.01	11.62	11.83
EBCC	floodplain	control		7.07	2.8	2.98	2.98	2.57	5.56	11.12	11.72	11.39
EBCC	floodplain	control		8.01	2.75	2.77	2.94	2.84	5.78	10.96	12.92	11.84
EBCC	floodplain	control		9.42	2.56	2.46	5.81	3.16	8.97	21.63	14.41	18.38
EBCC	floodplain	control		8.89	2.76	2.55	3.15	2.83	5.98	11.74	12.88	12.25
EBCC	floodplain	control		7.73	3.09	2.9	4.47	3.02	7.5	16.67	13.77	15.36
EBCC	terra firme	control		6.2	3.35	2.96	3.05	2.27	5.32	11.36	10.32	10.89
EBCC	terra firme	control		6.77	3	2.83	2.95	2.11	5.06	10.99	9.6	10.36
EBCC	terra firme	control		6.68	2.95	2.82	2.62	2.04	4.66	9.76	9.3	9.56
EBCC	terra firme	control		8.33	2.76	2.57	3.18	2.62	5.79	11.83	11.92	11.87
EBCC	terra firme	control		6.21	3.13	2.96	2.3	2.11	4.41	8.55	9.62	9.03
EBCC	terra firme	control		6.43	2.96	3.05	3.44	2.33	5.77	12.82	10.59	11.82
EBCC	terra firme	control		7.65	2.81	2.8	3.61	2.73	6.35	13.46	12.45	13.01
EBCC	terra firme	control		8.47	2.6	2.61	3.1	2.71	5.81	11.55	12.34	11.9
EBCC	terra firme	control		5.28	3.38	3.27	1.79	1.8	3.59	6.67	8.19	7.35
EBCC	terra firme	control		5.99	2.98	3.17	2.83	2.05	4.88	10.56	9.31	10
EBCC	floodplain	control		8.06	2.69	2.86	2.53	2.89	5.43	9.44	13.18	11.12
EBCC	terra firme	control		7.68	2.88	2.75	3.17	2.5	5.67	11.81	11.4	11.63
EBCC	terra firme	control		8.83	2.64	2.51	4.26	2.88	7.13	15.86	13.1	14.62
EBCC	terra firme	control		7.93	2.7	2.75	3.43	2.8	6.22	12.77	12.75	12.76
EBCC	terra firme	control		6.7	3.05	2.85	3.03	2.13	5.16	11.28	9.71	10.57
EBCC	terra firme	control		4.1	3.95	3.72	2.6	1.62	4.22	9.69	7.37	8.64
EBCC	terra firme	control		4.99	3.47	3.18	2.38	1.45	3.83	8.86	6.62	7.85
EBCC	terra firme	control		7.61	2.94	2.62	3.7	2.32	6.03	13.79	10.58	12.35
EBCC	terra firme	control		7.41	2.96	2.95	4.92	2.9	7.83	18.35	13.22	16.04
EBCC	terra firme	control		7.46	2.95	2.97	2.23	2.73	4.96	8.29	12.43	10.16
EBCC	terra firme	control		6.49	3.84	3.48	4.09	2.9	6.98	15.22	13.19	14.31
EBCC	terra firme	control		7.67	3.04	2.78	4.51	2.91	7.43	16.81	13.27	15.22
EBCC	terra firme	control		7.19	3.31	3.28	3.57	2.97	6.54	13.32	13.51	13.41
EBCC	terra firme	control		6.16	3.21	3.13	3.32	2.38	5.7	12.39	10.84	11.69
EBCC	terra firme	control		6.56	3.06	3.19	3.21	2.54	5.75	11.96	11.56	11.78
EBCC	terra firme	control		5.97	3.39	2.96	3.65	2.12	5.77	13.58	9.66	11.82
EBCC	terra firme	control		9.33	2.44	2.53	4.37	3.12	7.48	16.27	14.19	15.33
EBCC	terra firme	control		7.9	2.9	2.82	3.57	2.95	6.52	13.31	13.44	13.37
EBCC	terra firme	control		7.39	2.97	2.87	2.43	2.44	4.87	9.04	11.11	9.97
EBCC	terra firme	control		8.35	2.94	2.62	3.58	2.86	6.44	13.35	13.01	13.2
EBCC	terra firme	control		8.7	3.26	2.9	4.72	3.64	8.36	17.61	16.57	17.14
EBCC	terra firme	control		6.78	2.93	3	3.42	2.48	5.9	12.76	11.3	12.1
EBCC	terra firme	control		6.54	2.99	2.95	2.84	2.24	5.07	10.57	10.18	10.4
EBCC	terra firme	control		6.65	2.92	3	3.46	2.36	5.82	12.9	10.75	11.93
EBCC	terra firme	control		6.95	2.88	3.43	5.15	2.63	7.78	19.2	11.96	15.94
EBCC	terra firme	control		9.44	2.41	2.57	3.6	3.1	6.69	13.4	14.11	13.72
EBCC	terra firme	control		7.43	3.22	2.81	3.04	2.32	5.36	11.33	10.55	10.98
EBCC	terra firme	control		6.26	3.25	3.37	3.25	2.55	5.8	12.11	11.63	11.9
EBCC	terra firme	control		8.18	2.73	2.6	3.77	2.76	6.52	14.03	12.56	13.37
EBCC	terra firme	control		6.24	3.62	2.94	1.65	1.73	3.38	6.15	7.87	6.92
EBCC	terra firme	control		8.46	3.28	3	4.25	3.57	7.82	15.84	16.27	16.03
EBCC	terra firme	control		8.8	2.7	2.46	3.54	2.7	6.24	13.18	12.31	12.78
EBCC	floodplain	control		7.74	2.91	2.79	3.32	2.8	6.12	12.36	12.77	12.55
EBCC	floodplain	control		7.18	2.89	2.98	2.81	2.56	5.37	10.49	11.65	11.01
EBCC	floodplain	control		5.41	3.5	3.5	4.16	2.23	6.4	15.51	10.18	13.11
EBCC	floodplain	control		4.93	3.46	3.32	2.84	1.78	4.62	10.58	8.11	9.47
EBCC	floodplain	control		4.74	4.19	3.39	2.74	1.84	4.58	10.21	8.36	9.38
EBCC	floodplain	control		6.1	3.13	3.09	3.43	2.1	5.53	12.78	9.57	11.34
EBCC	floodplain	control		7.36	2.79	2.86	3.64	2.37	6.01	13.55	10.79	12.31
EBCC	floodplain	control		7.86	2.74	2.78	2.58	2.41	5	9.62	10.99	10.24
EBCC	floodplain	control		5.28	3.67	3.75	4.21	2.17	6.38	15.69	9.88	13.08
EBCC	floodplain	control		4.43	4.19	3.57	3.15	1.81	4.97	11.75	8.26	10.18
EBCC	floodplain	control		6.27	3.12	2.89	2.71	1.87	4.58	10.11	8.5	9.38
EBCC	floodplain	control		4.43	3.8	3.64	1.57	1.32	2.89	5.85	6	5.91
EBCC	floodplain	control		3.29	4	3.85	2.15	1.12	3.27	8.01	5.1	6.7
EBCC	floodplain	control		6.78	3.22	2.9	3.39	2.3	5.69	12.64	10.47	11.67
EBCC	floodplain	control		4.64	3.77	3.36	1.86	1.56	3.42	6.93	7.1	7.01
EBCC	floodplain	control		7.16	2.96	2.83	3.62	2.61	6.23	13.47	11.91	12.77
EBCC	floodplain	control		7.9	2.8	2.77	4.09	2.87	6.97	15.25	13.08	14.27
EBCC	floodplain	control		8.32	2.99	2.85	4.5	3.14	7.64	16.77	14.29	15.66
EBCC	floodplain	control		5.61	3.99	3.85	3.12	2.44	5.57	11.64	11.13	11.41
EBCC	floodplain	control		8.26	2.81	2.8	3.55	3.06	6.61	13.24	13.92	13.54
EBCC	floodplain	control		5.76	3.08	3.09	2.23	1.81	4.04	8.32	8.23	8.28
EBCC	floodplain	control		5.6	3.24	3.12	2.79	1.92	4.7	10.38	8.72	9.64
EBCC	floodplain	control		4.94	3.63	3.41	2.27	1.89	4.16	8.44	8.61	8.52
EBCC	floodplain	control		4.73	3.47	3.2	2.02	1.5	3.52	7.53	6.84	7.22
EBCC	floodplain	control		8.08	3.02	2.74	2.9	2.93	5.83	10.8	13.36	11.95
EBCC	floodplain	control		6.89	3.28	3.02	4.79	2.67	7.46	17.86	12.15	15.29
EBCC	floodplain	control		11.28	2.37	2.22	5.26	3.64	8.9	19.61	16.58	18.24
EBCC	floodplain	control		5.42	3.57	3.14	2.58	1.98	4.56	9.63	9	9.35
EBCC	floodplain	control		9.19	2.64	2.63	4.63	3.27	7.91	17.26	14.91	16.2
EBCC	floodplain	control		7.86	2.79	2.78	3.85	2.64	6.49	14.35	12.01	13.3
EBCC	floodplain	control		7.86	2.94	3.21	4.31	3	7.31	16.07	13.66	14.99
LLNR	red soil	LT1s1	large morphotype	7.77	2.81	2.69	2.73	2.64	5.36	11.13	10.75	10.94
LLNR	red soil	LT1s2	large morphotype	7.95	2.91	2.65	2.72	2.61	5.33	11.08	10.66	10.87
LLNR	red soil	LT1s9	large morphotype	7.1	2.88	2.77	2.68	2.39	5.07	10.93	9.76	10.35
LLNR	red soil	LT1s11	large morphotype	7.68	2.85	2.75	3.4	2.54	5.94	13.86	10.38	12.12
LLNR	red soil	LT1s14	large morphotype	4.39	4.25	3.63	2.2	1.67	3.87	8.98	6.8	7.89
LLNR	white soil	LT2s1	small morphotype	8.6	2.58	2.84	3.99	3.17	7.15	16.26	12.91	14.59
LLNR	white soil	LT2s4	small morphotype	7.04	2.79	3.03	2.17	2.49	4.65	8.83	10.14	9.48
LLNR	white soil	LT2s6	small morphotype	6.17	3.89	3.67	4.37	2.62	6.99	17.82	10.68	14.25
LLNR	white soil	LT2s9	small morphotype	6.51	2.95	3.07	2.74	2.26	5.01	11.19	9.23	10.21
LLNR	white soil	LT2s12	small morphotype	5.78	3.67	3.58	2.22	1.91	4.13	9.07	7.79	8.43
LLNR	white soil	LT3s1	small morphotype	6.81	3.09	3	3.15	2.49	5.64	12.86	10.14	11.5
LLNR	white soil	LT3s3	small morphotype	8.71	2.7	2.61	3.9	3.06	6.96	15.93	12.46	14.19
LLNR	white soil	LT3s13	small morphotype	9.59	2.49	2.54	3.82	3.43	7.25	15.56	14	14.78
LLNR	red soil	LT3s8	large morphotype	9.25	2.63	2.44	3.65	2.99	6.64	14.9	12.18	13.54
LLNR	white soil	LT3s11	small morphotype	8.39	2.85	2.77	5.36	3.2	8.56	21.85	13.04	17.45
LLNR	white soil	LT3s11	large morphotype	9.73	2.62	2.47	4.05	3.45	7.5	16.53	14.08	15.3
LLNR	red soil	LT4s3	large morphotype	8.33	2.75	2.62	3.19	2.96	6.15	12.97	12.05	12.51
LLNR	red soil	LT4s4	large morphotype	8.09	2.94	2.6	2.62	2.58	5.21	10.7	10.53	10.62
LLNR	red soil	LT4s6	large morphotype	8.04	2.73	2.73	2.01	2.61	4.62	8.17	10.64	9.41
LLNR	red soil	LT4s9	large morphotype	6.94	2.92	2.86	3.3	2.43	5.73	13.46	9.9	11.68
LLNR	red soil	LT4s10	large morphotype	8.92	3.19	2.72	3.58	3.42	7.01	14.61	13.96	14.29
LLNR	red soil	LT4s11	large morphotype	6.02	3.24	3.21	2.12	2.19	4.31	8.63	8.94	8.78
LLNR	red soil	LT4s12	large morphotype	6.48	3.16	2.94	2.53	2.24	4.77	10.31	9.11	9.71
LLNR	red soil	LT4s15	large morphotype	8.01	3.11	2.66	4.69	2.93	7.62	19.13	11.95	15.54
LLNR	red soil	LT5s1	large morphotype	7.81	2.92	2.65	3.39	2.52	5.91	13.82	10.27	12.05
LLNR	red soil	LT5s3	large morphotype	7.71	2.88	2.66	2.53	2.39	4.92	10.33	9.75	10.04
LLNR	red soil	LT5s6	large morphotype	8.53	2.61	2.61	3.93	2.98	6.91	16	12.11	14.05
LLNR	red soil	LT5s7	large morphotype	9.11	2.83	2.46	3.25	2.91	6.17	13.27	11.87	12.57
LLNR	red soil	LT5s8	large morphotype	7.87	2.91	2.62	3	2.56	5.57	12.25	10.46	11.35
LLNR	red soil	LT5s9	large morphotype	10.38	2.75	2.31	3.93	3.11	7.04	16.03	12.67	14.35
LLNR	red soil	LT6s7	small morphotype	7.01	3.94	3.27	4.83	2.89	7.72	19.7	11.78	15.74
LLNR	red soil	LT6s9	small morphotype	8.8	3.01	2.94	5.36	3.5	8.87	21.88	14.29	18.08
LLNR	red soil	LT6s12	small morphotype	6.76	3.04	2.83	2.73	2.27	4.99	11.12	9.25	10.18
LLNR	red soil	LT6s16	small morphotype	7.67	2.94	2.83	4.06	2.78	6.83	16.55	11.32	13.94
LLNR	red soil	LT6s20	small morphotype	6.13	3.11	2.98	2.57	2.11	4.68	10.5	8.61	9.55
LLNR	red soil	LT7s1	small morphotype	8.81	2.84	2.66	4.63	3.19	7.82	18.89	13.02	15.95
LLNR	red soil	LT7s5	small morphotype	8.49	2.87	2.62	3.1	2.69	5.79	12.66	10.97	11.81
LLNR	red soil	LT7s7	small morphotype	9.43	2.69	2.48	2.28	2.96	5.24	9.28	12.08	10.68
LLNR	red soil	LT7s11	small morphotype	6.32	3.57	3.02	1.42	2.04	3.46	5.79	8.32	7.06
LLNR	red soil	LT7s14	small morphotype	7.23	3.12	2.98	2.03	2.54	4.6	6.45	9.1	8.98
LLNR	white soil	LT8s6	small morphotype	7.35	3.04	3.06	4.68	2.89	7.57	19.09	11.79	15.44
LLNR	white soil	LT8s8	small morphotype	7.73	2.77	2.75	2.85	2.77	5.62	11.62	11.29	11.45
LLNR	white soil	LT8s17	small morphotype	8.53	2.92	3.01	4.82	3.34	8.16	19.65	13.63	16.64
LLNR	white soil	LT8s22	small morphotype	5.3	3.36	3.37	2.68	1.97	4.65	10.94	8.02	9.48
LLNR	white soil	LT8s29	small morphotype	6.34	4.02	3.5	4.31	2.63	6.94	17.57	10.74	14.16
LLNR	white soil	LT8s29	large morphotype	6.34	4.02	3.5	4.31	2.63	6.94	17.57	10.74	14.16
LLNR	red soil	LT9s1	large morphotype	7.87	3.14	2.81	4.83	2.9	7.73	19.71	11.82	15.76
LLNR	red soil	LT9s4	large morphotype	7.82	2.76	2.81	3.54	2.9	6.44	14.43	11.8	13.11
LLNR	red soil	LT9s7	large morphotype	6.28	3.23	3.28	3.13	2.31	5.44	12.76	9.43	11.1
LLNR	red soil	LT9s10	large morphotype	6.98	2.92	2.98	3.95	2.58	6.52	16.06	10.5	13.28
LLNR	red soil	LT9s13	large morphotype	6.55	3.28	2.94	1.68	1.85	3.53	6.84	7.54	7.19
LLNR	red soil	LT9s15	large morphotype	10.23	2.67	2.51	2.15	3.09	5.25	8.78	12.62	10.7
LLNR	red soil	LT9s23	large morphotype	7.71	3.08	2.79	4.24	2.84	7.08	17.31	11.57	14.44
LLNR	white soil	LT10s1	small morphotype	8.92	2.77	2.62	3.83	3	6.83	15.61	12.25	13.93
LLNR	white soil	LT10s11	small morphotype	6.75	3.03	2.99	1.73	2.34	4.07	7.07	9.53	8.3
LLNR	white soil	LT10s14	small morphotype	7.55	3.03	2.77	4.35	2.77	7.12	17.73	11.3	14.51
LLNR	white soil	LT10s20	small morphotype	6.62	3.06	2.92	2.96	2.29	5.25	12.06	9.35	10.7
LLNR	white soil	LT10s29	small morphotype	9.5	2.47	2.51	3.8	3.11	6.91	15.49	12.68	14.09
LLNR	white soil	LT11s26	small morphotype	9.19	2.87	3.01	5.19	3.58	8.77	21.17	14.61	17.89
LLNR	white soil	LT11s10	small morphotype	8.06	2.85	2.89	4.39	3.01	7.4	17.87	12.24	15.06
LLNR	white soil	LT11s17	small morphotype	7.99	2.73	2.64	3.22	2.66	5.87	13.12	10.84	11.98
LLNR	white soil	LT11s12	small morphotype	8.36	2.87	2.67	4.36	2.88	7.24	17.79	11.76	14.77
LLNR	white soil	LT11s6	small morphotype	8.81	2.8	2.59	2.11	2.74	4.85	8.61	11.19	9.9
LLNR	white soil	LT11s3	small morphotype	8.52	2.87	2.71	3.02	2.44	5.47	12.33	9.97	11.15
LLNR	white soil	LT12s3	small morphotype	8.03	2.87	2.63	2.52	2.82	5.33	10.26	11.5	10.88
LLNR	white soil	LT12s18	small morphotype	4.9	4.06	3.36	2.56	1.83	4.4	10.45	7.48	8.97
LLNR	white soil	LT12s18	large morphotype	4.9	4.06	3.36	2.56	1.83	4.4	10.45	7.48	8.97
LLNR	white soil	LT12s21	small morphotype	8.36	2.85	2.62	3.82	3	6.83	15.59	12.25	13.92
LLNR	white soil	LT12s21	large morphotype	8.36	2.85	2.62	3.82	3	6.83	15.59	12.25	13.92
LLNR	white soil	LT12s23	small morphotype	4.72	3.93	3.52	2.7	1.81	4.52	11.03	7.4	9.21
LLNR	white soil	LT12s26	small morphotype	8.32	2.86	2.63	3.04	2.73	5.77	12.4	11.14	11.77
LLNR	red soil	large morpho 1	large morphotype	6.64	3.24	2.94	3.33	2.41	5.74	13.54	9.82	11.68
LLNR	red soil	large morpho 2	large morphotype	8.28	2.84	2.61	4.14	2.95	7.09	16.84	12.02	14.43
LLNR	red soil	large morpho 3	large morphotype	8.53	3.03	2.62	5.29	3.17	8.46	21.53	12.92	17.22
LLNR	red soil	large morpho 4	large morphotype	6.28	3.32	2.85	2.34	1.94	4.29	9.54	7.9	8.72
LLNR	red soil	large morpho 5	large morphotype	6.98	2.92	2.98	3.95	2.58	6.52	16.06	10.5	13.28
LLNR	red soil	large morpho 6	large morphotype	7.21	2.74	2.81	3.75	2.46	6.2	15.25	10	12.62
LLNR	red soil	large morpho 7	large morphotype	7.62	3.28	2.95	3.73	3.01	6.73	15.17	12.23	13.7
LLNR	red soil	large morpho 8	large morphotype	6.52	3.23	2.99	3.03	2.45	5.48	12.32	9.99	11.16
LLNR	red soil	large morpho 9	large morphotype	8.06	2.85	2.89	4.39	3.01	7.4	17.87	12.24	15.06
ACTS	floodplain	AT1s1	acaulis	6.68	2.95	2.89	2.94	2.39	5.32	11.82	9.61	10.71
ACTS	floodplain	AT1s10	acaulis	8.11	3.3	3.18	5.63	3.33	8.96	22.64	13.42	18.03
ACTS	floodplain	AT1s13	acaulis	7.59	2.91	3.35	4.01	2.92	6.93	16.15	11.75	13.95
ACTS	floodplain	AT1s2	acaulis	8.53	2.57	2.84	3.81	3.13	6.94	15.33	12.62	13.97
ACTS	floodplain	AT1s3	acaulis	9.68	2.39	2.6	4.89	3.5	8.4	19.7	14.09	16.89
ACTS	floodplain	AT1s7	acaulis	8.13	2.66	2.73	3.73	2.94	6.67	15.01	11.83	13.42
ACTS	floodplain	AT1s8	acaulis	9.53	2.49	2.53	4.4	3.49	7.89	17.71	14.03	15.87
ACTS	floodplain	AT1s9	acaulis	8.72	2.96	3.15	6.07	3.6	9.67	24.41	14.5	19.45
ACTS	floodplain	AT2s1	acaulis	6.84	3.03	2.99	2.96	2.55	5.51	11.93	10.25	11.09
ACTS	floodplain	AT2s4	acaulis	4.38	3.99	3.75	2.43	1.74	4.17	9.78	7.02	8.4
ACTS	floodplain	AT2s4	macrostachys	4.77	3.71	3.53	2.66	1.86	4.52	10.7	7.49	9.1
ACTS	floodplain	AT2s4	acaulis	8.58	2.51	2.73	3.39	3.03	6.42	13.64	12.18	12.91
ACTS	floodplain	AT3s1	acaulis	7.82	2.91	2.65	3.25	2.83	6.08	13.08	11.38	12.23
ACTS	floodplain	AT3s3	acaulis	7.05	2.94	2.94	3.47	2.63	6.09	13.96	10.57	12.26
ACTS	floodplain	AT3s5	acaulis	6.81	2.79	2.99	3.07	2.4	5.46	12.34	9.65	11
ACTS	floodplain	AT3s7	acaulis	7.09	2.93	2.82	3.74	2.59	6.33	15.06	10.43	12.75
ACTS	floodplain	AT4s2	acaulis	6.09	3.42	3.11	3.43	2.35	5.78	13.8	9.47	11.63
ACTS	floodplain	AT4s4	acaulis	8.72	2.66	2.63	4.64	3.24	7.88	18.66	13.05	15.86
ACTS	floodplain	AT4s6	acaulis	8.69	2.84	2.64	5.42	3.27	8.69	21.81	13.17	17.49
ACTS	floodplain	AT4s7	acaulis	7.1	2.84	2.99	3.82	2.65	6.47	15.38	10.67	13.02
ACTS	floodplain	AT5s10	acaulis	5.43	3.34	3.25	3.22	2.04	5.25	12.94	8.2	10.57
ACTS	floodplain	AT5s11	acaulis	6.37	3.08	3.04	3.57	2.42	5.98	14.35	9.73	12.04
ACTS	floodplain	AT5s12	acaulis	7.02	3	2.9	3.62	2.65	6.27	14.56	10.67	12.62
ACTS	floodplain	AT5s13	acaulis	4.84	3.56	3.2	1.77	1.72	3.49	7.14	6.91	7.03
ACTS	floodplain	AT5s2	macrostachys	5.27	3.45	3.29	2.42	1.92	4.34	9.73	7.73	8.73
ACTS	floodplain	AT5s2	macrostachys	6.66	2.99	3	3.16	2.42	5.58	12.71	9.76	11.23
ACTS	floodplain	AT5s3	macrostachys	7.47	2.86	2.95	3.71	2.77	6.48	14.92	11.15	13.03
ACTS	floodplain	AT5s5	acaulis	5.12	3.9	3.55	3.43	2.12	5.55	13.8	8.52	11.16
ACTS	floodplain	AT5s5	acaulis	8.19	2.84	2.86	4.65	3.19	7.85	18.73	12.85	15.79
ACTS	floodplain	AT5s8	acaulis	5.19	3.61	3.5	3.18	2.1	5.28	12.8	8.46	10.63
ACTS	floodplain	AT6s1	acaulis	7.33	3.2	3.07	3.58	2.91	6.49	14.41	11.71	13.06
ACTS	floodplain	AT6s2	acaulis	7.04	3.12	2.94	3.78	2.73	6.52	15.22	11	13.11
ACTS	floodplain	AT6s4	acaulis	6.7	3.12	3.08	2.84	2.59	5.43	11.43	10.41	10.92
ACTS	floodplain	AT6s5	acaulis	6.46	3.15	3.15	3.7	2.51	6.2	14.88	10.09	12.48
ACTS	floodplain	AT6s6	acaulis	7.54	3	2.95	3.67	2.88	6.54	14.76	11.57	13.17
ACTS	floodplain	AT6s8	acaulis	7.61	2.67	3	2.67	2.7	5.37	10.73	10.88	10.81
ACTS	floodplain	AT7s2	acaulis	5.41	3.33	3.27	2.62	1.95	4.57	10.54	7.86	9.2
ACTS	floodplain	AT7s4	acaulis	6.64	3.26	3.19	3.76	2.48	6.24	15.14	9.99	12.56
ACTS	floodplain	AT8s1	acaulis	7.54	2.87	2.72	3.72	2.71	6.43	14.97	10.9	12.94
ACTS	floodplain	AT8s4	acaulis	7.49	2.77	2.94	3.4	2.84	6.24	13.68	11.44	12.56
ACTS	floodplain	AT8s5	acaulis	6.74	2.88	3.03	3.27	2.5	5.77	13.17	10.05	11.61
ACTS	floodplain	AT8s6	macrostachys	4.68	3.75	3.4	2.14	1.77	3.91	8.62	7.11	7.86
ACTS	terra firme	AT9s11	macrostachys	5.61	3.41	3.24	3.44	2.19	5.62	13.83	8.8	11.31
ACTS	terra firme	AT9s12	macrostachys	7.25	3.79	3.42	4.71	3	7.71	18.94	12.08	15.51
ACTS	terra firme	AT9s15	macrostachys	6.56	3.25	3.13	2.78	2.42	5.2	11.21	9.74	10.47
ACTS	terra firme	AT9s2	macrostachys	5.41	3.38	3.25	2.99	2.06	5.05	12.01	8.29	10.15
ACTS	terra firme	AT9s4	macrostachys	5.31	3.75	3.7	3.84	2.21	6.04	15.44	8.87	12.16
ACTS	terra firme	AT9s7	macrostachys	5.02	3.43	3.88	2.23	1.9	4.13	8.97	7.65	8.31
ACTS	terra firme	AT10s11	macrostachys	8.68	2.77	2.75	3.69	3.2	6.89	14.87	12.87	13.87
ACTS	terra firme	AT10s12	macrostachys	8.04	2.83	2.93	3.99	3.03	7.02	16.07	12.18	14.13
ACTS	terra firme	AT10s2	macrostachys	6.47	3.09	3.1	2.76	2.45	5.21	11.11	9.87	10.49
ACTS	terra firme	AT10s6	macrostachys	6.16	3.56	3.24	2.72	2.47	5.19	10.95	9.95	10.45
ACTS	terra firme	AT10s7	macrostachys	8.22	2.69	2.68	3.16	2.86	6.02	12.72	11.52	12.12
ACTS	terra firme	AT10s9	macrostachys	6.52	2.99	2.94	3.02	2.32	5.34	12.15	9.33	10.74
ACTS	terra firme	AT11s10	macrostachys	6.99	2.98	2.84	3.69	2.53	6.22	14.85	10.17	12.51
ACTS	terra firme	AT11s3	macrostachys	6.96	4.08	3.98	5.7	3.07	8.77	22.92	12.35	17.64
ACTS	terra firme	AT11s4	macrostachys	5.8	3.41	3.01	2.52	1.88	4.4	10.13	7.57	8.85
ACTS	terra firme	AT11s5	macrostachys	5.42	3.36	3.58	2.67	2.16	4.83	10.74	8.7	9.72
ACTS	terra firme	AT11s7	macrostachys	7.62	3.12	2.9	4.55	3	7.55	18.3	12.09	15.2
ACTS	terra firme	AT11s9	macrostachys	7.49	3.05	2.7	2.71	2.59	5.29	10.89	10.41	10.65
ACTS	terra firme	AT12s1	macrostachys	7.96	2.75	2.87	3.99	2.97	6.96	16.04	11.97	14
ACTS	terra firme	AT12s10	macrostachys	5.82	3.23	3.21	2.55	2.18	4.73	10.27	8.76	9.51
ACTS	terra firme	AT12s11	acaulis	6.84	3.07	3.06	2.81	2.51	5.32	11.29	10.1	10.7
ACTS	terra firme	AT12s11	macrostachys	4.66	3.42	3.39	2.35	1.72	4.07	9.47	6.92	8.2
ACTS	terra firme	AT12s13	macrostachys	7.17	2.93	2.73	2.24	2.48	4.72	9.02	9.97	9.49
ACTS	terra firme	AT12s14	macrostachys	5.28	3.36	3.1	1.86	1.69	3.55	7.49	6.81	7.15
ACTS	terra firme	AT12s3	macrostachys	6.41	3.36	2.91	3.46	2.38	5.83	13.91	9.57	11.74
ACTS	terra firme	AT12s7	macrostachys	7.23	2.79	2.89	2.53	2.61	5.14	10.19	10.5	10.35
ACTS	terra firme	AT12s8	macrostachys	6.32	3.29	3.48	3.17	2.51	5.68	12.74	10.1	11.42
ACTS	terra firme	AT13s1	macrostachys	6.9	3.28	2.89	3.5	2.58	6.08	14.09	10.39	12.24
ACTS	terra firme	AT13s10	acaulis	5.86	3.54	2.93	2.52	2.01	4.53	10.12	8.09	9.11
ACTS	terra firme	AT13s12	macrostachys	7.76	3.27	3.42	4.86	3.26	8.12	19.56	13.1	16.33
ACTS	terra firme	AT13s5	macrostachys	7.96	2.9	3.51	4.66	3.21	7.87	18.75	12.93	15.84
ACTS	terra firme	AT13s7	macrostachys	8.71	2.73	2.57	3.97	3.03	7	15.99	12.18	14.08
ACTS	terra firme	AT13s8	macrostachys	7.09	3.16	2.94	3.74	2.63	6.37	15.07	10.57	12.82
ACTS	terra firme	AT13s9	macrostachys	7.5	3.03	2.67	3	2.52	5.53	12.08	10.16	11.12
ACTS	terra firme	AT13s9	acaulis	7.24	2.88	2.75	3.31	2.52	5.83	13.3	10.16	11.73
ACTS	floodplain	AT14s2	macrostachys	5.21	3.27	3.68	2.7	2	4.7	10.88	8.04	9.46
ACTS	floodplain	AT14s4	macrostachys	6.16	3.38	3.38	3.89	2.44	6.33	15.66	9.82	12.74
ACTS	floodplain	AT14s5	macrostachys	5.27	3.54	3.94	3.24	2.16	5.4	13.05	8.68	10.87
ACTS	floodplain	control		7.62	3.01	2.9	3.69	2.95	6.65	14.87	11.88	13.38
ACTS	floodplain	control		7.14	2.89	2.92	3.08	2.67	5.75	12.39	10.75	11.57
ACTS	floodplain	control		6.32	2.95	2.97	2.57	2.2	4.77	10.33	8.87	9.6
ACTS	floodplain	control		7.46	2.98	2.97	3.97	2.84	6.81	15.97	11.45	13.71
ACTS	floodplain	control		6.11	3.52	3.43	4.06	2.52	6.57	16.32	10.13	13.22
ACTS	floodplain	control		7.53	2.75	2.75	3.57	2.69	6.26	14.37	10.81	12.59
ACTS	floodplain	control		7.53	2.86	2.86	4.04	2.85	6.89	16.26	11.47	13.86
ACTS	floodplain	control		6.12	3.34	3.22	2.79	2.39	5.18	11.25	9.61	10.43
ACTS	floodplain	control		8.13	2.66	2.78	3.56	2.95	6.52	14.34	11.88	13.11
ACTS	floodplain	control		7.6	2.82	2.95	4.61	2.94	7.55	18.57	11.81	15.19
ACTS	floodplain	control		6.69	2.97	2.96	3.08	2.4	5.48	12.4	9.66	11.03
ACTS	floodplain	control		10.32	3.29	4.34	7.86	4.5	12.36	31.63	18.1	24.87
ACTS	floodplain	control		7.25	2.92	2.85	2.95	2.7	5.65	11.88	10.86	11.37
ACTS	floodplain	control		5.95	3.31	2.99	2.54	2.12	4.65	10.21	8.52	9.36
ACTS	floodplain	control		3.05	4.01	3.75	1	1.04	2.04	4.03	4.19	4.11
ACTS	floodplain	control		4.76	3.61	3.52	2.43	1.75	4.19	9.8	7.06	8.43
ACTS	terra firme	control		7.13	2.79	3.01	3.55	2.65	6.2	14.27	10.68	12.47
ACTS	terra firme	control		6.03	3.15	3.07	2.99	2.24	5.22	12.01	9	10.51
ACTS	terra firme	control		7.32	2.95	2.92	3.68	2.77	6.45	14.81	11.15	12.98
ACTS	floodplain	control		4.49	3.69	3.63	2.72	1.79	4.51	10.94	7.21	9.07
ACTS	terra firme	control		7.37	2.97	2.83	3.49	2.76	6.24	14.03	11.1	12.56
ACTS	terra firme	control		6.58	3.47	3.29	4.04	2.7	6.74	16.25	10.88	13.57
ACTS	terra firme	control		7.21	3.33	2.99	4.17	2.83	7	16.78	11.41	14.09
ACTS	terra firme	control		7.05	2.87	2.89	2.58	2.54	5.12	10.4	10.22	10.31
ACTS	terra firme	control		7.28	2.78	2.82	2.89	2.56	5.45	11.64	10.29	10.96
ACTS	terra firme	control		4.97	3.34	3.5	1.92	1.83	3.75	7.72	7.36	7.54
ACTS	terra firme	control		5.19	3.41	3.26	2.32	1.91	4.23	9.35	7.67	8.51
ACTS	terra firme	control		6.75	3.13	2.84	3.44	2.44	5.87	13.83	9.81	11.82
ACTS	terra firme	control		7.19	3.13	2.74	3.72	2.55	6.28	14.99	10.28	12.63
ACTS	floodplain	control		6.98	2.95	2.87	2.7	2.52	5.22	10.87	10.15	10.51
ACTS	floodplain	control		5.78	3.16	3.16	2.99	2.17	5.17	12.04	8.75	10.39
ACTS	floodplain	control		6.08	3.14	3.02	2.44	2.22	4.66	9.81	8.93	9.37
ACTS	floodplain	control		7.23	2.84	2.75	3.05	2.47	5.52	12.26	9.95	11.11
ACTS	floodplain	control		6.25	3.34	3.13	2.53	2.37	4.9	10.19	9.52	9.86
ACTS	floodplain	control		8.31	2.98	3.11	5.56	3.41	8.97	22.38	13.72	18.05
ACTS	terra firme	control		6.78	3.07	2.96	3.88	2.54	6.42	15.63	10.21	12.92
ACTS	floodplain	control		6.21	3.15	3.32	3.45	2.37	5.83	13.9	9.55	11.72
ACTS	terra firme	control		6.83	3.26	3.1	4.08	2.58	6.66	16.42	10.37	13.39
ACTS	terra firme	control		8.54	2.63	2.59	3.79	2.97	6.77	15.26	11.97	13.61
ACTS	terra firme	control		7.22	2.84	2.77	2.93	2.44	5.37	11.78	9.82	10.8
ACTS	terra firme	control		8.94	2.57	2.62	4.43	3.24	7.67	17.85	13.02	15.44
ACTS	terra firme	control		7.82	3.1	2.97	4.03	3.12	7.15	16.22	12.54	14.38
ACTS	terra firme	control		7.22	3.41	3.1	4.48	2.9	7.38	18.04	11.68	14.86
ACTS	terra firme	control		9.92	2.48	2.42	4.77	3.44	8.22	19.22	13.85	16.53
ACTS	terra firme	control		7.45	2.88	2.78	3.86	2.73	6.59	15.55	10.98	13.26
ACTS	floodplain	control		5.65	3.12	3.07	2.21	1.93	4.14	8.88	7.77	8.33
ACTS	floodplain	control		6.88	3.18	3.16	3.85	2.66	6.5	15.48	10.7	13.09
ACTS	floodplain	control		6.82	2.89	2.9	3.16	2.47	5.63	12.73	9.94	11.34
ACTS	floodplain	control		6.56	3.28	3.19	3.23	2.61	5.84	13	10.52	11.76
ACTS	floodplain	control		6.32	2.88	3.02	2.62	2.19	4.81	10.53	8.83	9.68
ACTS	floodplain	control		8.24	2.67	2.77	4.03	3.08	7.1	16.2	12.39	14.29
ACTS	floodplain	control		6.52	3.37	3.21	4.25	2.6	6.86	17.12	10.48	13.8
ACTS	floodplain	control		6.09	3.48	3.06	3.87	2.34	6.21	15.59	9.4	12.5
ACTS	terra firme	control		6.29	3.06	3.21	3.85	2.43	6.28	15.49	9.79	12.64
ACTS	floodplain	control		6.18	3.49	3.34	4.27	2.54	6.81	17.19	10.23	13.71
ACTS	floodplain	control		5.59	3.23	3.37	2.34	2.12	4.46	9.42	8.52	8.97
ACTS	floodplain	control		5.29	3.49	3.19	2.31	1.99	4.3	9.29	8.01	8.65
ACTS	floodplain	control		6.18	3.89	3.59	3.6	2.57	6.17	14.5	10.33	12.41
ACTS	floodplain	control		7.79	2.62	2.84	3.69	2.83	6.52	14.85	11.37	13.11
ACTS	terra firme	control		7.67	2.81	2.73	4	2.74	6.74	16.11	11.01	13.56
ACTS	terra firme	control		8.89	2.56	2.82	3.76	3.31	7.07	15.13	13.34	14.24
ACTS	terra firme	control		7.58	2.77	2.83	3.56	2.79	6.35	14.34	11.21	12.78
ACTS	terra firme	control		6.43	3.28	3.04	3.36	2.43	5.79	13.53	9.76	11.64
ACTS	terra firme	control		5.23	3.32	3.11	1.76	1.69	3.45	7.1	6.8	6.95
ACTS	terra firme	control		6.43	3.07	3.02	2.29	2.17	4.46	9.2	8.74	8.97
ACTS	terra firme	control		6.78	2.88	2.92	2.65	2.43	5.08	10.67	9.8	10.23
ACTS	terra firme	control		6.44	3.61	3.11	4.01	2.56	6.56	16.12	10.28	13.2
ACTS	terra firme	control		7.5	2.9	2.77	3.36	2.69	6.04	13.51	10.81	12.16
ACTS	terra firme	control		7.11	3.01	2.97	3.78	2.74	6.52	15.2	11.04	13.12
ACTS	terra firme	control		7.08	3.03	2.72	2.02	2.32	4.34	8.14	9.32	8.73
ACTS	terra firme	control		6.17	3.38	3.33	3.91	2.5	6.42	15.74	10.07	12.91
ACTS	terra firme	control		6.74	2.83	2.93	2.15	2.34	4.49	8.67	9.41	9.04
ACTS	terra firme	control		8.66	2.95	2.51	4.21	2.99	7.2	16.94	12.04	14.49
ACTS	terra firme	control		7.46	3.02	2.79	3.7	2.7	6.4	14.88	10.89	12.88
ACTS	terra firme	control		7.82	2.75	2.83	3.49	2.88	6.37	14.04	11.59	12.81
ACTS	terra firme	control		6.14	3.23	3.12	3.46	2.3	5.77	13.94	9.27	11.61
ACTS	terra firme	control		6.37	3.09	3.44	3.38	2.42	5.8	13.6	9.75	11.68
ACTS	floodplain	control		7.49	3.21	3.01	4.02	2.99	7.01	16.18	12.02	14.1
ACTS	floodplain	control		6.9	3	2.87	3.65	2.52	6.17	14.7	10.12	12.41
ACTS	floodplain	control		7.13	2.94	2.89	3.41	2.65	6.06	13.71	10.66	12.19
